1  
2  
3  
4  
5  
6  
7  
8  
9  
10  
11  
12  
13  
14  
15  
16  
17  
18  
19  
20  
21  
22  
23  
24  
25  
26  
27

**Topologically correct synthetic reconstruction of pathogen social behavior found in deep tissue sites**

**Running title: *Yersinia pseudotuberculosis* replication in microdroplets.**

Stacie A. Clark<sup>1,2</sup>, Derek Thibault<sup>3</sup>, Lauren M. Shull<sup>1,2</sup>, Kimberly M. Davis<sup>4</sup>, Emily Aunins<sup>1,5</sup>,  
Tim van Opijnen\*<sup>3</sup>, Ralph R. Isberg\*<sup>1,5</sup>

<sup>1</sup>Department of Molecular Biology and Microbiology

<sup>2</sup>Graduate Program in Molecular Microbiology, Tufts University Graduate School of Biomedical Sciences, Boston, MA, USA

<sup>3</sup>Department of Biology, Boston College, Boston, MA, USA

<sup>4</sup>W. Harry Feinstone Department of Molecular Microbiology and Immunology  
Johns Hopkins Bloomberg School of Public Health, Baltimore, MD, USA

<sup>5</sup>Tufts University School of Medicine, Boston, MA, USA

\*Corresponding authors:

E-mails: [Ralph.Isberg@tufts.edu](mailto:Ralph.Isberg@tufts.edu) (RI); [vanopijn@bc.edu](mailto:vanopijn@bc.edu) (TvO)

28 **Abstract**

29 Within deep tissue sites, extracellular bacterial pathogens often replicate in clusters that are  
30 surrounded by immune cells. Disease is modulated by interbacterial interactions as well as  
31 bacterial-host cell interactions resulting in microbial growth, phagocytic attack and secretion of  
32 host antimicrobial factors. To overcome the limited ability to manipulate these infection sites,  
33 we established a system for *Yersinia pseudotuberculosis* (*Yptb*) growth in microfluidics-driven  
34 microdroplets that regenerates microbial social behavior in tissues. Chemical generation of nitric  
35 oxide (NO) in the absence of immune cells was sufficient to reconstruct microbial social  
36 behavior, as witnessed by expression of the NO-inactivating protein Hmp on the extreme  
37 periphery of microcolonies, mimicking spatial regulation in tissues. Similarly, activated  
38 macrophages that expressed inducible NO synthase (iNOS) drove peripheral expression of Hmp,  
39 allowing regeneration of social behavior observed in tissues. These results argue that  
40 topologically correct microbial tissue growth and associated social behavior can be reconstructed  
41 in culture.

42

43

44

## 45 **Introduction**

46           A variety of bacterial pathogens colonize and replicate within tissues despite the presence  
47 of the host immune system (Carter & Collins, 1974; Cheng et al., 2009; Simonet et al., 1990).  
48 Growth in tissue sites involves the formation of distinct foci of replication, which can develop  
49 into either abscesses, granulomas, or poorly defined clusters of bacteria (Cheng et al., 2011;  
50 Pagan & Ramakrishnan, 2018). Extracellular bacterial pathogens, in particular, can establish a  
51 tissue niche and replicate to high numbers. These clusters of bacteria in tissues are often clonal,  
52 result in distinct microcolonies, and are surrounded by host innate immune cells.

53           *Yersinia pseudotuberculosis* (*Yptb*) is an enteric pathogen that replicates in the intestinal  
54 lumen and regional lymph nodes, with the potential for disseminating via a poorly characterized  
55 route into deep tissue sites such as the liver or spleen (Barnes et al., 2006). Once colonized, *Yptb*  
56 establishes extracellular foci of replication, resulting in the formation of microcolonies that  
57 develop into lesions that are densely populated by immune cells (Simonet et al., 1990). Within  
58 the murine spleen, the bacterium sets up a beachhead in which distinct microcolonies are derived  
59 from a single seeding bacterium (Davis et al., 2015). Surrounding the bacterial microcolony,  
60 which contains between 50-5000 bacteria, are strata of immune cells. In direct contact with the  
61 population center are neutrophils, which have cytoskeletal elements that are paralyzed by the  
62 abutting bacteria that translocate Type III Secretion System (TTSS) effectors. As a consequence,  
63 phagocytosis of the pathogen by surrounding neutrophils is severely disrupted and reactive  
64 oxygen species (ROS) production is greatly reduced (Songsunthong et al., 2010). The resulting  
65 neutrophil-bacterium interface appears to result in a stable relationship, in which frustrated  
66 phagocytes bind, but do not internalize the nearby bacteria. Surrounding this sphere of

67 neutrophils are macrophages, monocytes, and other immune cells, which appear to be recruited  
68 as a response to failure to clear the focus of infection.

69         The recruitment of neutrophils and macrophages around a cluster of *Yptb* exposes the  
70 bacterial population to different microenvironments, depending on the locale within the  
71 microcolony occupied by individual bacteria. This drives the phenotypic specialization of  
72 different microbial regulatory subpopulations that counter the host attack. Peripheral bacteria that  
73 are in direct contact with neutrophils upregulate their T3SS to facilitate disruption of neutrophil  
74 function and allow a ring of ineffective immune cells to surround the infection site (Davis et al.,  
75 2015). These bacteria are also part of a larger peripheral subpopulation of bacteria that neutralize  
76 nitric oxide (NO) gas being produced by the surrounding macrophages, resulting in upregulation  
77 of the NO-detoxifying protein, Hmp. The majority of the bacterial peripheral subpopulation that  
78 responds to NO is not in direct contact with any host cells, meaning that there is a specialized  
79 subpopulation that does not directly interface with host cells, but which responds to humoral  
80 anti-microbial factors. Importantly, this peripheral subpopulation participates in social behavior,  
81 as its ability to inactivate NO via the Hmp protein protects bacteria in the core of the  
82 microcolony from NO stress. In the absence of Hmp protein, the entire microcolony is exposed  
83 to NO attack, with the consequence that the microcolony eventually disintegrates and the  
84 bacteria are killed in tissues (Davis et al., 2015).

85         Although live animal models provide valuable insight into the spatial organization of  
86 bacterial subpopulations and immune cells in tissue, analysis is currently limited to microscopy  
87 of fixed tissue, with little opportunity to study the dynamics of the infection process or perform  
88 genetic analysis. Tissue culture models rely on infection of cells within a monolayer, which fail  
89 to reproduce the architecture of bacterial microcolonies surrounded by immune cells in host

90 tissue sites. There has been limited analysis of the dynamics of bacterial growth in tissue,  
91 investigation of the spatial relationship between immune cells and the bacteria, or identification  
92 of inter-bacterial communication within the growing microbial populations in tissues. To bridge  
93 the gap between animal infection models and tissue culture models, we developed a chemical  
94 strategy to incorporate the architecture of inflammatory sites in a tissue culture system.

95 In this report, we develop an *in vitro* system that uses droplet-based microfluidics to  
96 generate matrix-embedded *Yptb* microcolonies encompassed by host innate immune cells. Social  
97 behavior of *Yptb* could be reproduced in the presence of a chemical NO generator, indicating that  
98 production of RNI by host innate immune cells does not require directional targeting of the  
99 bacteria by these cells, but rather is a consequence of multi-cell collaboration to generate toxic  
100 amounts of RNI. We observed similar results using activated macrophages that express iNOS,  
101 mimicking social behavior in tissue. The strength of this approach is that this type of topological  
102 analysis of *Yptb*-host cell interaction is unattainable in murine and tissue culture models of  
103 infection, allowing for development of high throughput screens not accessible using current  
104 culture systems.

105

## 106 **Results**

### 107 **Droplet gels support clonal growth of *Yersinia pseudotuberculosis* microcolonies.**

108 *Yptb* microcolonies in the murine spleen are derived from single isolated bacteria that  
109 replicate as extracellular clusters and become surrounded by innate immune cells (Davis et al.,  
110 2015; Simonet et al., 1990). In order to accurately model the growth of *Yptb* in deep tissue sites,  
111 a single bacterium needs to be isolated and grown into a microcolony in a matrix that supports  
112 this 3-dimensional (3D) topology. To encase single bacterial cells in matrix, we utilized droplet-

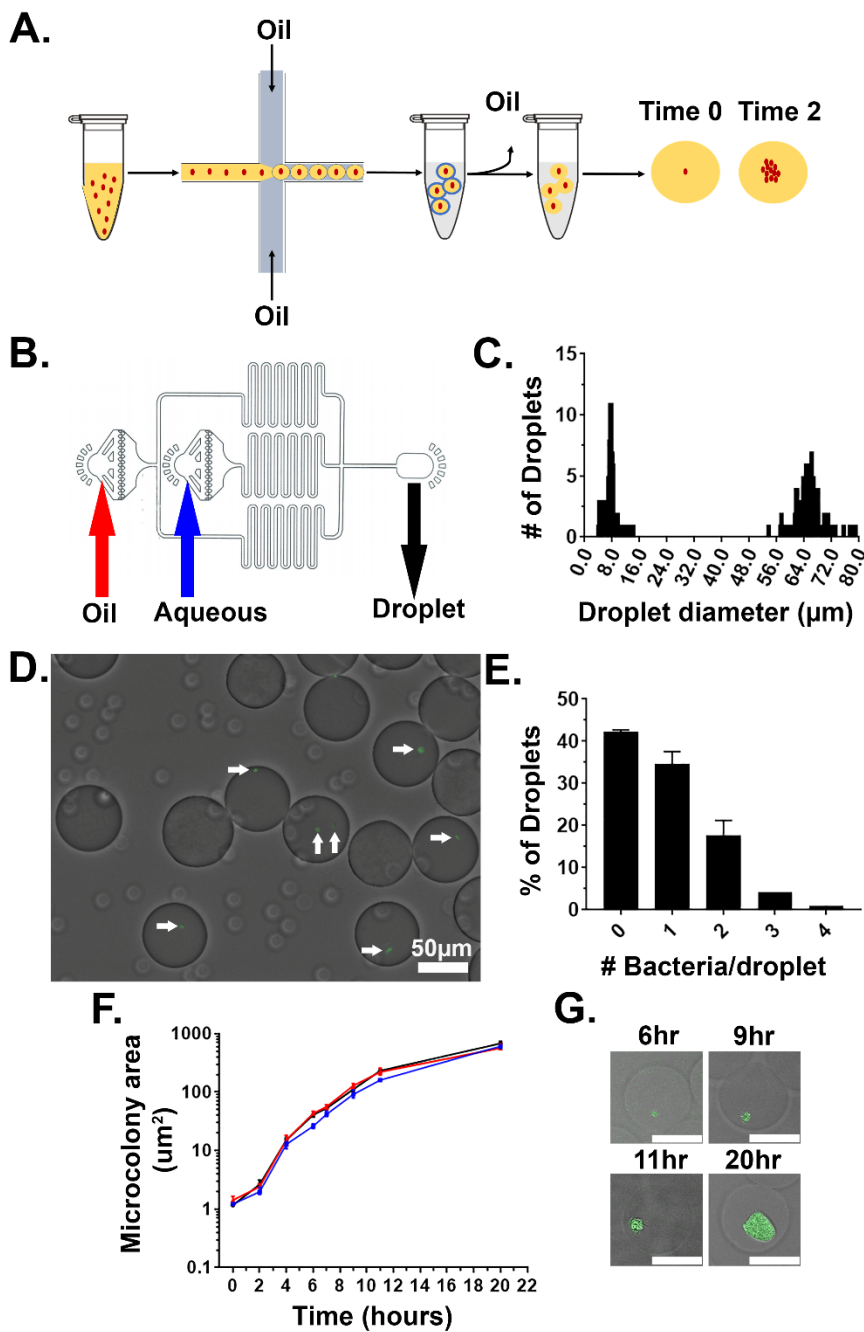

**Figure 1. Droplet gels support clonal growth of *Yersinia pseudotuberculosis*.**

A. *Y. pseudotuberculosis* was added to molten agarose/HyStem<sup>®</sup>-C Hydrogel and introduced into a microfluidics device, allowing encapsulation within oil-coated droplets (Materials and Methods). Oil was removed from the droplets and bacteria were cultured *in situ* within the droplets (Thibault et al., 2019). B. Design of the microfluidics device. Noted are oil and aqueous (molten gel/bacteria mixture) phase inlets (red and blue arrows, respectively). Droplets were collected into a tube at the droplet output (black arrow) (Thibault et al., 2019). C. Distribution of droplet sizes prior to oil removal. Droplet size was determined by capturing images

from phase contrast microscopy followed by image processing (Materials and Methods). D, E. Droplets largely contain one or two bacterial cells immediately after encapsulation. D. Image of droplets containing *Y. pseudotuberculosis gfp*<sup>+</sup>. E. Presence of bacteria was scored immediately after encapsulation by phase contrast and fluorescence microscopy, scoring for GFP. F. *Y. pseudotuberculosis* grows within colonies in droplets. Droplets containing encapsulated *Y. pseudotuberculosis* were cultured at 26°C, and microcolonies were visualized at indicated timepoints by phase contrast and fluorescence microscopy. Microcolony areas were determined by image analysis (Materials and Methods). Each timepoint is median +/- 95% confidence interval

(CI) of 3 biological replicates of 50 microcolonies. G. Representative images of microcolonies from (F) at the noted times visualized by phase contrast and fluorescence microscopy. Scale bar: 50 $\mu$ m.

113 based microfluidics, which is commonly used for isolating single mammalian cells (Koster et al.,  
114 2008; Macosko et al., 2015; Mazutis et al., 2013).

115 *Yptb* was added to a matrix consisting of molten 1% ultra-low melt agarose containing  
116 25% HyStem<sup>®</sup>-C Hydrogel. HyStem<sup>®</sup>-C Hydrogel has thiol-modified hyaluronan and gelatin,  
117 allowing on-demand polymerization of these two components controlled by the addition of a  
118 thiol-reactive crosslinker (Fig. 1A). The biomatrix was included in the droplet mixture to add  
119 components that allow multivalent adhesion sites for attachment of mammalian immune cells  
120 (Cha et al., 2017; Giancotti & Ruoslahti, 1999). The mixture was then placed in a syringe pump  
121 and under constant flow injected into a fabricated two-inlet microfluidics device, with oil  
122 introduced into the other inlet, allowing encapsulation of the bacteria in a droplet matrix  
123 surrounded by oil (Fig. 1B; Materials and Methods). At a final concentration of  $5 \times 10^6$   
124 bacteria/ml, the majority of droplets contained a single bacterium, as predicted by the Poisson  
125 distribution (Fig. 1D and 1E) (Mazutis et al., 2013; Thibault et al., 2019). Notably, there were  
126 two groups of droplets that were collected in the output (Fig. 1C). The large droplets contained  
127 bacteria and were approximately 65  $\mu\text{m}$  in diameter ( $\sim 144$  pl), while the small, satellite droplets  
128 were about 8  $\mu\text{m}$  in diameter (Fig. 1C and 1D). After droplet generation, HyStem<sup>®</sup>-C Hydrogel  
129 was crosslinked within the agarose using Extralink<sup>®</sup>, a thiol-reactive crosslinker, at room  
130 temperature and oil was removed from the droplets (Materials and Methods). During oil  
131 removal, the population of small droplets was lost, and only the larger droplets remained.

132 In tissue, *Yptb* microcolonies form clusters (Simonet et al., 1990). We wanted to confirm  
133 that *Yptb* grows as a cluster inside the agarose/ HyStem<sup>®</sup>-C Hydrogel droplets. To this end *Yptb*  
134 expressing GFP (Ptet::*gfp*, expressed from pACYC184) was encapsulated in droplets, oil was  
135 removed, and the droplets were incubated at 26 °C in 2xYT broth with rotation. Microcolony



136 growth was determined by identifying a threshold that defines edges of microcolonies in the GFP  
137 channel and determining the number of pixels in the region of interest (ROI). The data were then  
138 converted to metric scale using a stage micrometer and displayed as  $\mu\text{m}^2$ . The area of the  
139 microcolony increased over time with roughly logarithmic kinetics over a 10-hour period,  
140 indicating that the agarose/ HyStem<sup>®</sup>-C Hydrogel droplets support efficient *Yptb* microcolony  
141 formation (Fig. 1F). The replicating bacteria also grew in clusters, with similar appearance to *Y.*  
142 *enterocolitica* grown in collagen gels (Fig. 1G) (Freund et al., 2008). Altogether, these results  
143 show that agarose/ HyStem<sup>®</sup>-C Hydrogel droplets support microcolony formation of *Yptb*,  
144 mimicking growth and topological constraints observed in tissue.

145

#### 146 **Droplet-generated *Yersinia pseudotuberculosis* microcolonies require Hmp to maintain** 147 **growth in the presence of NO**

148       Upon sensing of microbes, inducible NO synthase (iNOS) is synthesized by immune cells  
149 to produce gaseous NO as an important line of host defense (Bogdan, 2001). NO has  
150 antimicrobial properties and can react with ROS to produce additional toxic reactive nitrogen  
151 intermediates (RNI). The bacterial protein, Hmp, detoxifies NO by converting it to nitrate (NO<sub>3</sub>)  
152 which is innocuous and can be used as an electron acceptor by the pathogen (R K Poole et al.,  
153 1996; R. K. Poole & Hughes, 2000; Robinson & Brynildsen, 2013). During growth in the murine  
154 spleen, bacteria located on the periphery of microcolonies express *hmp*, and loss of Hmp  
155 attenuates *Yptb* disease (Davis et al., 2015). To evaluate if Hmp is also required during growth in  
156 droplet microcolonies in the presence of NO, droplet microcolonies and broth cultured bacteria  
157 were comparatively evaluated for NO sensitivity. *Yptb* WT and  $\Delta hmp$  *gfp*<sup>+</sup> were encapsulated in  
158 droplets, cultured *in situ* for 7 hours, and exposed to varying concentrations of the NO donor

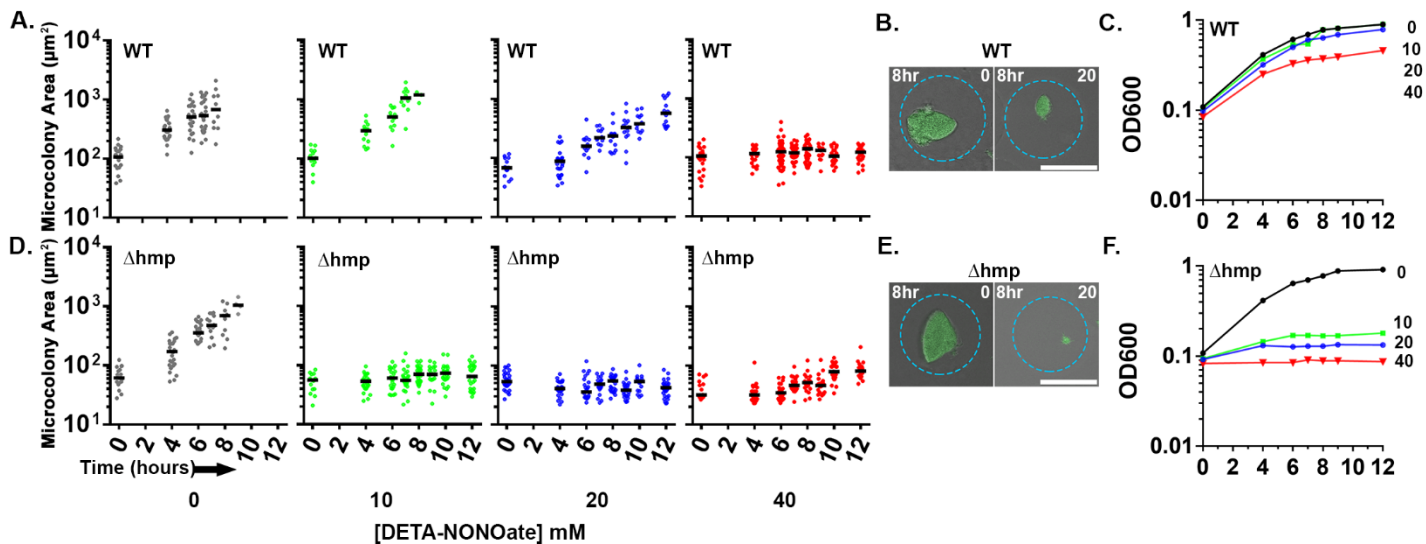

**Figure 2. Droplet-generated *Yersinia pseudotuberculosis* microcolonies require Hmp to maintain growth in presence of NO.** Indicated *Y. pseudotuberculosis* strains were cultured in 2xYT with rotation at 26 °C for 7 hours prior to DETA-NONOate exposure. At the indicated timepoints, an aliquot of droplets was fixed and visualized by fluorescence microscopy. (A, D). Microcolony area determined from captured images followed by image analysis (Materials and Methods). Each point represents a single droplet with median noted. (B, E). Representative WT (B) and  $\Delta hmp$  (E) microcolonies after 8 hours of treatment with and without DETA-NONOate. Scale bar: 50 $\mu\text{m}$ . (C, F). Overnight broth cultures of *Y. pseudotuberculosis* were diluted 1:10 in 2xYT broth prior to addition of DETA-NONOate. At indicated timepoints, culture density was determined (Materials and Methods).

159 DETA-NONOate. Microcolony area was measured over time through a single plane. In parallel,  
160 the two strains were grown in broth culture. The growth of the WT and  $\Delta hmp$  microcolonies was  
161 similar in the droplets in the absence of DETA-NONOate (Fig. 2A and 2D). The microcolonies  
162 derived from WT were relatively resilient to NO insult, with complete blockage of growth only  
163 observed at extreme concentrations (40mM DETA-NONOate) (Fig. 2A). In contrast, the  $\Delta hmp$   
164 strain was blocked from replicating in droplets at all concentrations of DETA-NONOate tested,  
165 indicating that Hmp is essential for growth under these conditions (Fig. 2D). Although 8 hours of  
166 20mM DETA-NONOate exposure showed some interference with replication in microdroplets,  
167 the WT microcolonies were clearly larger than  $\Delta hmp$  mutant microcolonies (Fig. 2B and 2E).  
168 Similar results were observed during growth in broth culture (Fig 2C and F). The  $\Delta hmp$  mutant  
169 strain was sensitive to all doses of DETA-NONOate in broth culture, while growth of the WT  
170 strain was relatively unaffected at lower doses (Fig. 2C and 2F). At the highest dose used (40  
171 mM), the microdroplet-encased WT colonies showed enhanced sensitivity relative to bacteria  
172 grown in broth (Figs. 2A and 2C). Nevertheless, these results indicate that Hmp is required to  
173 maintain optimum growth of microcolonies in the presence of NO.

174

### 175 **Topological constraints drive non-uniform expression of *hmp*.**

176 During infection by *Yptb*, subpopulations of bacteria within microcolonies respond to  
177 distinct microenvironments (Davis et al., 2015). Peripheral bacteria upregulate Hmp to detoxify  
178 products of iNOS generated by immune cells, while interior bacteria are protected from RNI and  
179 show no such upregulation. The droplet microcolonies are morphologically similar to  
180 microcolonies during infection, so we predicted that *hmp* would also be expressed peripherally in  
181 response to DETA-NONOate. To probe for non-uniform expression in response to DETA-

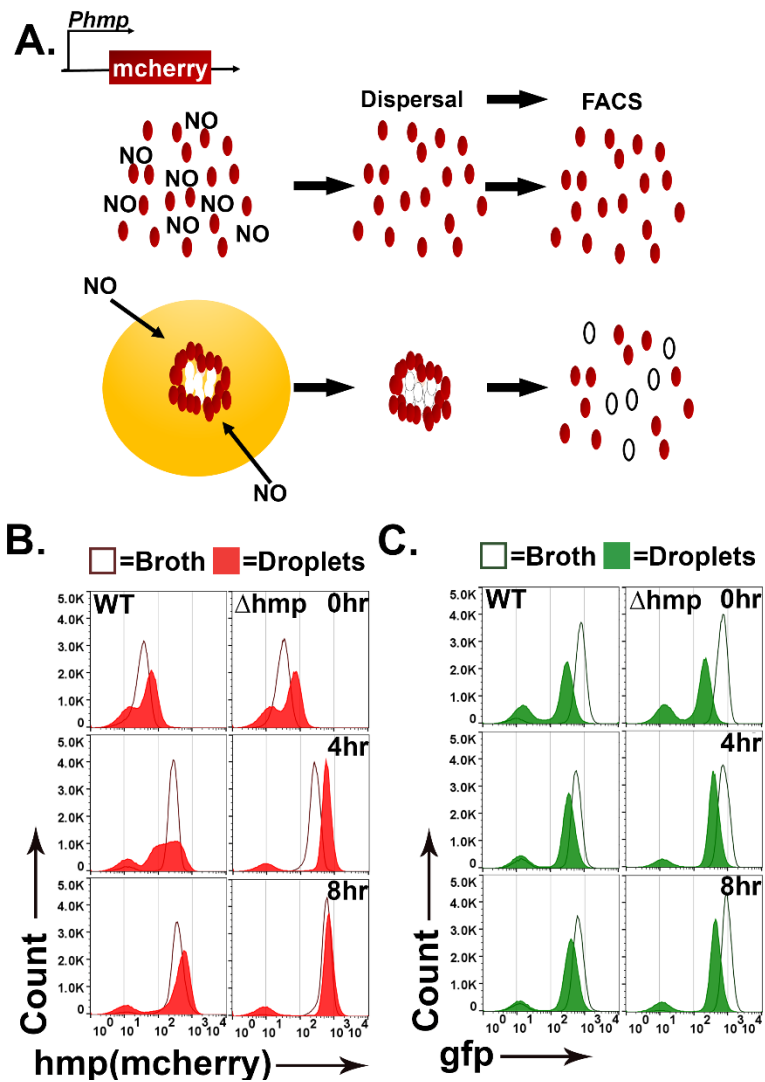

**Figure 3. Topological constraints drive non-uniform expression of *hmp*.** (A). Model of the predicted outcome for the nitric oxide (NO) response of *Y. pseudotuberculosis* grown in broth versus droplet culture (Davis et al., 2015). Red: bacteria showing high expression of  $P_{hmp}$ -*mCherry* reporter. White: bacteria showing undetectable mCherry fluorescence. (B, C). *Y. pseudotuberculosis* grown in droplet microcolonies show altered response to NO. Noted bacterial strains harboring  $gfp^+$   $P_{hmp}$ -*mcherry* plasmids were grown in either broth (open histograms) or droplets (filled histograms) in the presence of NO donor for the noted times. Droplet microcolonies were dispersed at noted times and analyzed by flow cytometry (Materials and Methods). B. Flow analysis of mCherry channel. C. Analysis of GFP channel.

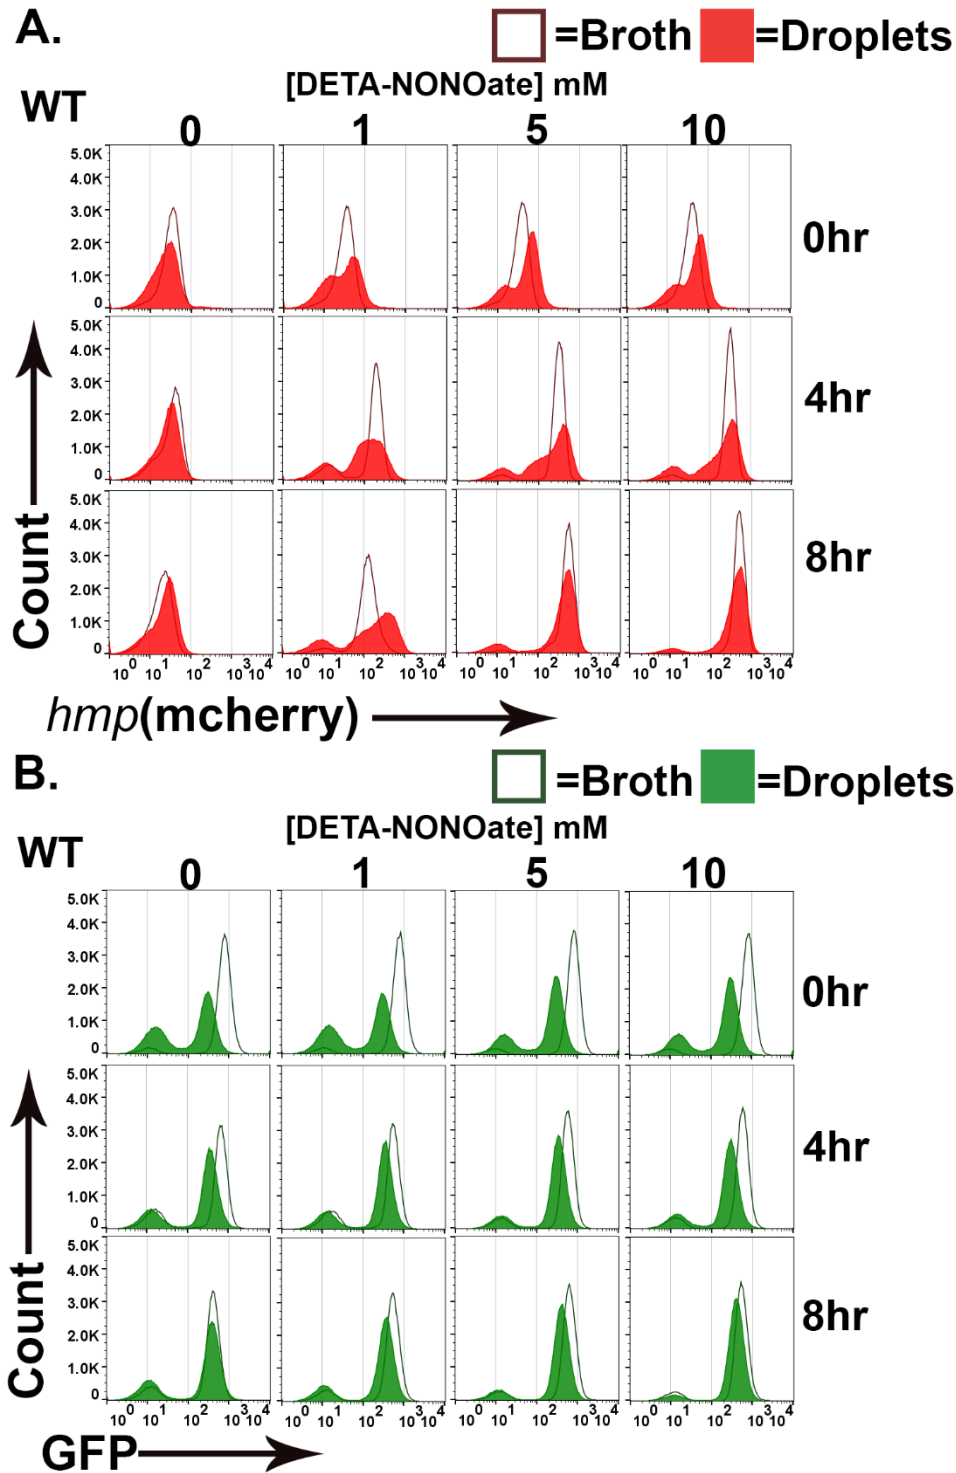

**Figure S1. Topological constraints drive non-uniform expression of *hmp*.** (A-D). *Y. pseudotuberculosis* grown in droplet microcolonies show altered response to NO. Noted bacterial strains harboring *gfp*<sup>+</sup> *P*<sub>*hmp*</sub>-*mcherry* plasmids were grown in either broth (open histograms) or droplets (filled histograms) in the presence of NO donor for the noted times. Droplet microcolonies were dispersed at noted times and analyzed by flow cytometry (Materials and Methods). A. Flow analysis of mCherry channel from WT. B. Analysis of GFP channel from WT. C. Flow analysis of mCherry channel from  $\Delta$ *hmp*. C. Analysis of GFP channel from  $\Delta$ *hmp*.

C.  = Broth  = Droplets

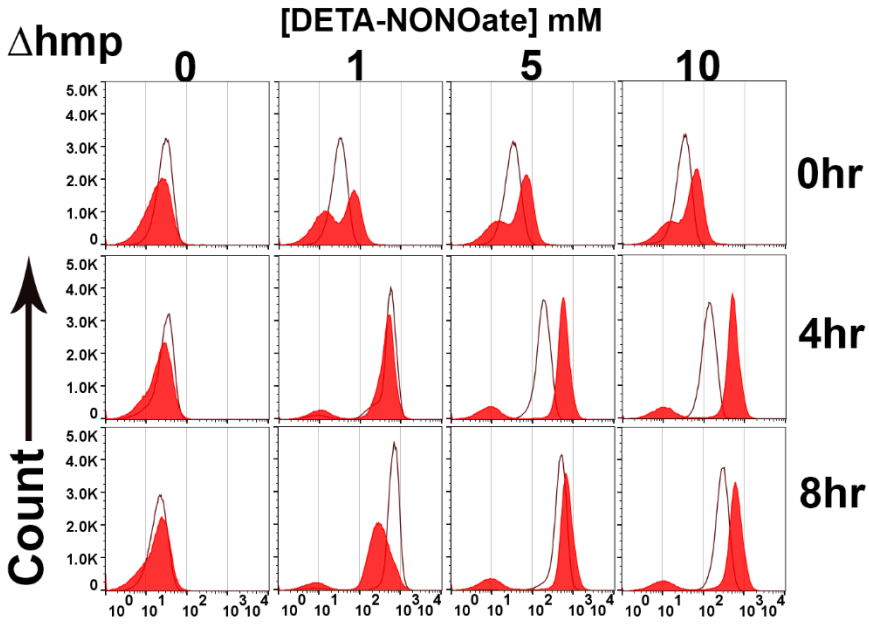

*hmp(mcherry)* →

D.  = Broth  = Droplets

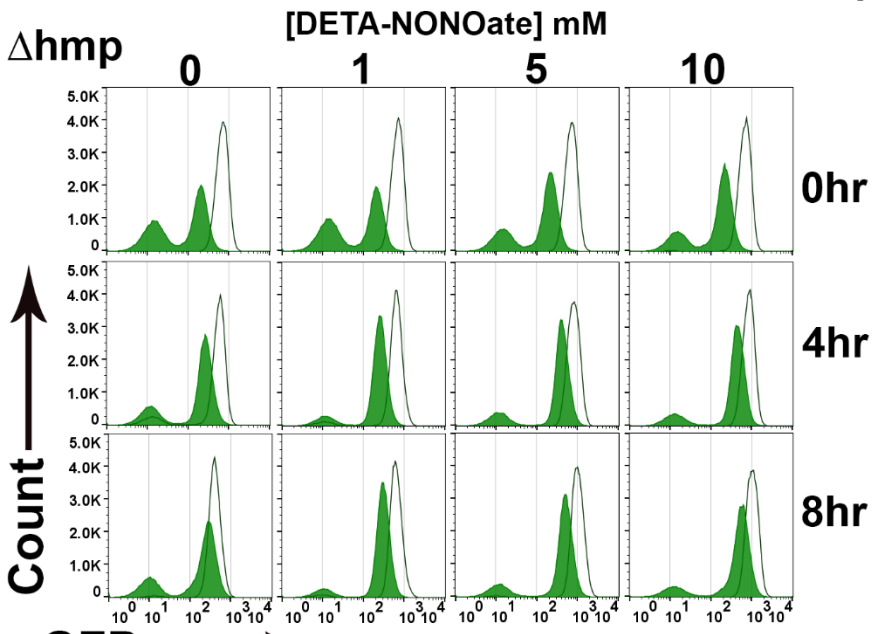

GFP →

182 NONOate, we compared the fluorescence of WT and  $\Delta hmp$  *gfp*<sup>+</sup> bacteria harboring a plasmid  
183 with the promoter of *hmp* driving expression of mCherry (*Phmp::mcherry*) after exposure to  
184 DETA-NONOate using flow cytometry. *Phmp::mcherry* expression should be uniform in broth  
185 cultures of WT *Yptb*, while *hmp* should exhibit nonuniform expression in droplets if microcolony  
186 structure drives spatial regulation of *hmp* expression (Fig. 3A: left).

187 To compare *Yptb* grown in droplet microcolonies to bacteria in broth cultures, a protocol  
188 was developed to disperse droplet microcolonies into single cells (Fig. 3A; Materials and  
189 Methods), to allow flow cytometry analysis of the constitutive *gfp* and *Phmp::mcherry* reporters.  
190 The WT and  $\Delta hmp$  strains harboring *gfp*<sup>+</sup> *Phmp::mcherry* were cultured in either droplet  
191 microcolonies or broth and exposed to 0, 1, 2.5, 5, and 10 mM of DETA-NONOate for 0, 4 and 8  
192 hours (Fig. 3B and C, Fig. S1) followed by flow cytometry analysis. In broth grown cultures,  
193 WT and  $\Delta hmp$  strains harboring *Phmp::mcherry* showed fluorescence intensity increases after  
194 NONOate exposure, with a single population of both *gfp* and *Phmp* high expressers and small  
195 populations of nonexpressers in all cases (Fig. 3B: dark-lined, open histograms). In contrast,  
196 starting at 4 hours post-exposure of DETA-NONOate to WT microcolonies growing in droplets,  
197 there was a broad distribution of *Phmp::mcherry* fluorescence compared to either broth culture  
198 or to the *gfp* fluorescence (Fig. 3B red-shaded profile: 4hr and S1A). Continued exposure to  
199 NONOate for 8 hours partially dissipated this broad peak, as the distribution of mCherry became  
200 more uniform and intense, although the fluorescence profile of the WT strain in microcolonies  
201 was clearly broader than when grown in broth culture (Fig. 3B: 8hr and S1A). These results are  
202 consistent with microcolony structure driving heterogeneous expression of *Phmp::cherry* in  
203 response to an RNI generator, with prolonged exposure decreasing heterogeneous firing of the  
204 promoter.

205           The heterogeneous *mcherry* reporter fluorescence in WT was dependent on the *hmp*  
206 promoter, as GFP expression driven by the unrepressed Tet promoter was uniform in bacteria  
207 that originate from broth culture and droplet microcolonies (Fig. 3C and S1B). Similar to the  
208 observations with *mcherry* there was a small population representing approximately 5% of the  
209 bacteria that failed to fire *gfp* perhaps due to the dispersal and fixation procedure. These results  
210 argue that microcolony topology is a critical factor that drives heterogeneity observed in  
211 bacterial subpopulations in response to different microenvironments.

212           The heterogenous distribution of *Phmp::mcherry* fluorescence was dependent on the  
213 presence of the Hmp protein. The introduction of the  $\Delta hmp$  mutation resulted in a distribution of  
214 *hmp::mcherry* fluorescence intensity from droplet microcolonies that was similar to that  
215 observed in broth cultures, although there was more rapid firing of the reporter than in broth,  
216 with maximal fluorescence already established after 4 hours exposure to DETA-NONOate (Fig.  
217 3B: right and S1C). Therefore, the entire microcolony has the potential to respond to RNI in the  
218 absence of Hmp, consistent with the Hmp protein acting to lower the amount of inducing RNI in  
219 a subpopulation of bacteria.

220

### 221 **Spatial regulation of *hmp* expression in tissues can be reproduced in droplet culture.**

222           We hypothesized that the heterogenous distribution of *Phmp::mcherry* fluorescence of  
223 WT *Yptb* as seen by flow cytometry analysis is indicative of spatial regulation of the promoter.  
224 To determine if the spatial regulation of *Phmp* observed in tissue can be reproduced in droplet  
225 culture, WT and  $\Delta hmp$  strains carrying the *gfp*<sup>+</sup> and *Phmp::mcherry* reporters were encapsulated  
226 in droplets, grown into microcolonies, and exposed to DETA-NONOate for 4 hours (Fig. 4A).  
227 WT microcolonies showed peripheral expression of *hmp*, while microcolonies lacking Hmp



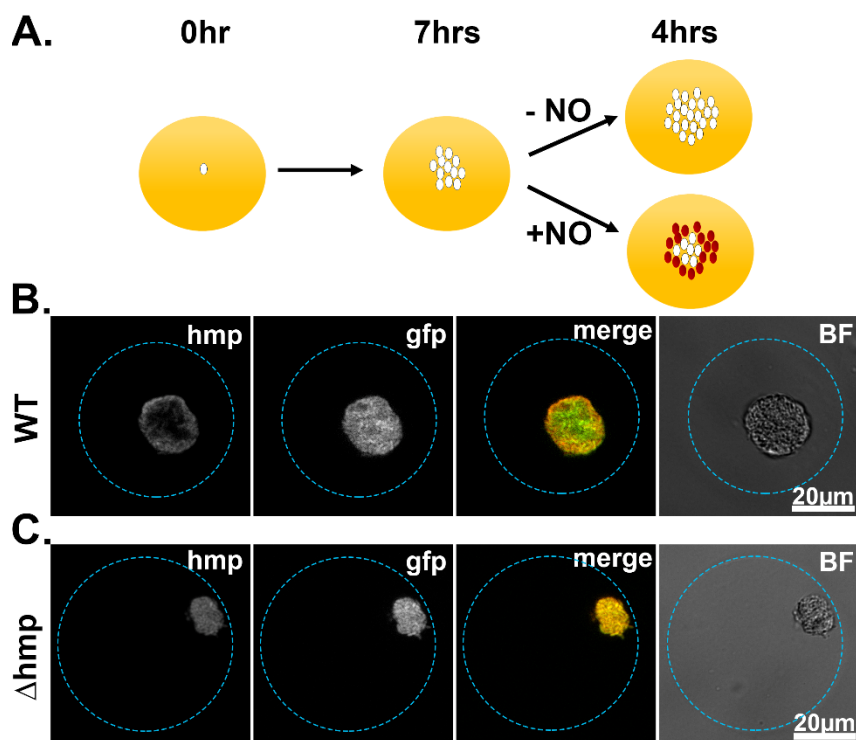

**Figure 4. Spatial regulation of *hmp* expression in tissues can be reproduced in droplet culture. (A).**

Experimental overview. Droplets seeded with *Y. pseudotuberculosis* harboring fluorescence reporters were incubated for 7 hours at 26 °C and varying concentrations of DETA-NONOate were added to the cultures for 4 hours at 37 °C, 5% CO<sub>2</sub>. After 4 hours, the droplets were fixed and visualized using brightfield and fluorescence microscopy. (B, C). Representative WT and  $\Delta$ *hmp* microcolonies after 4 hours of treatment with 1mM DETA-NONOate.

228 show uniform expression of the *hmp* reporter (Fig. 4B and 4C, respectively). Peripheral  
229 expression was dependent upon the NO-driven signal, as the constitutive GFP signal was  
230 uniform throughout the microcolonies (Fig. 4B).

231 To quantitatively analyze spatial regulation of *hmp*, an automated script was developed  
232 from images captured using a 63X lens (Fig. 5A). The script defines the periphery of  
233 microcolony and sets a mask to determine the region of interest (ROI), allowing a user-defined  
234 width extending into the microcolony (12 pixel-radius structuring elements used throughout  
235 study) and a point of lowest intensity (PLI, 5 pixel-radius structuring element used here)  
236 identified in each ROI (determinants displayed in Fig. 5B). The fluorescence at the periphery is  
237 calculated as a ratio of the average pixel intensity of the mCherry channel divided by the average  
238 pixel intensity of the GFP channel in the periphery. The fluorescence at the PLI is also calculated  
239 this way and the periphery versus PLI ratio is determined. A ratio greater than 1 indicates  
240 preferential peripheral expression of *Phmp::mcherry*.

241 There was a significant increase in the periphery vs. PLI ratio in WT microcolonies in  
242 response to DETA-NONOate after 4 hour exposure at concentrations of 1 or 2.5 mM, indicating  
243 peripheral expression of *hmp::mcherry* (Fig. 6A, left;  $P < 0.0001$ ). Peripheral expression in the  
244 presence vs. absence of RNI stress was independent of colony size, as there was no difference in  
245 microcolony area after DETA-NONOate exposure in WT microcolonies (Fig. 6B: left).  
246 Microcolonies lacking Hmp, in contrast, had uniform expression of the *hmp* reporter indicated by  
247 a ratio  $\sim 1$  (Fig. 6A: right). Interestingly, the periphery vs PLI ratio in microcolonies lacking Hmp  
248 significantly decreased in the presence of DETA-NONOate ( $P < 0.0001$ ). This indicates that RNI  
249 likely accumulate in the center of microcolonies in the absence of Hmp, a phenomenon also  
250 observed in tissue (Davis et al., 2015). Microcolonies lacking Hmp were significantly smaller

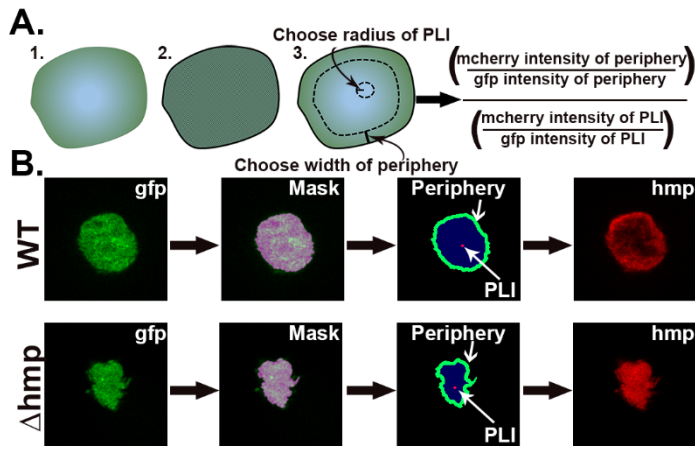

**Figure 5. Strategy for quantification of *hmp* expression localized on periphery of microcolonies.** A. Design of script that allows the identification of regions of interest (ROIs) for the purpose of determining the average fluorescence intensities and normalization strategies within the ROIs. Script defines periphery of microcolony and sets mask, allowing a user-defined width extending into the microcolony along with a point of lowest intensity (PLI) which is determined based on the mCherry signal for each microcolony. The fluorescence at the periphery is calculated as a ratio of the average pixel intensity of the mCherry channel in periphery divided by the average pixel intensity of the GFP channel in the periphery, allowing normalization for bacterial expression. The fluorescence for the defined PLI is also calculated in the same fashion, and the periphery versus PLI ratio is determined (Supplemental Data). B. Example of identification of periphery, mask generation and definition of peripheral ROI. The GFP channel defines the periphery, allowing mask to be set. Within the mask, the periphery is defined as extending 12 pixels into the microcolony. The PLI within the mask is defined as the area of 5-pixel radius with the lowest intensity in the mCherry channel.

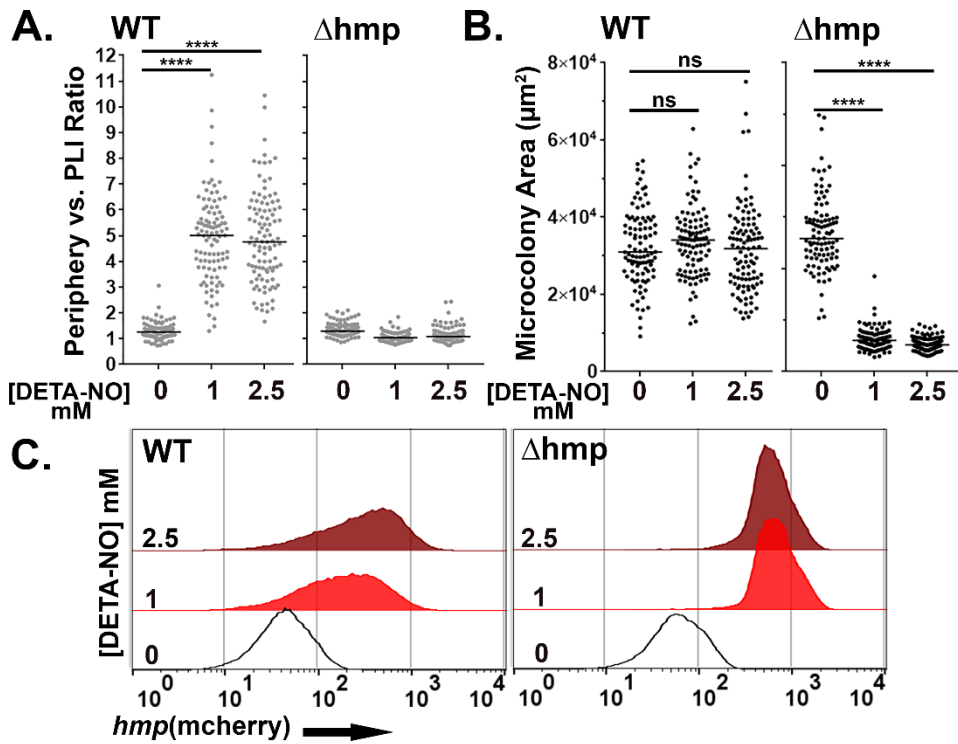

**Figure 6. Hmp activity is required for peripheral expression of *hmp* in response to NO.** (A-C). The presence of Hmp activity is required for *Y. pseudotuberculosis* to have enhanced expression of  $P_{hmp}$  in microcolonies exposed to NO. A. Periphery versus PLI ratio for microcolonies as a function of DETA-NO concentration in microcolonies from noted bacterial strains. B. Microcolony area ( $\mu\text{m}^2$ ) for WT and  $\Delta hmp$  microcolonies at different concentrations of DETA-NO. Black circles: 100 individual microcolonies measured for each condition. Lines indicate the medians. (C). Flow cytometric analysis of dispersed microcolonies. Droplets were dispersed into single cells after 4 hours of DETA-NO treatment at noted concentrations and subjected to flow cytometry (Materials and Methods). Bacteria were gated for GFP<sup>+</sup> and analyzed for mCherry signal. Statistics: Mann-Whitney test, \*\*\*\*p<0.0001, ns: not significant.

251 after DETA-NONOate exposure, further showing detoxification by Hmp is required for the  
252 growth of a microcolony (Fig. 6B: right,  $P < 0.0001$ ).

253 Flow cytometry analysis of WT *Yptb* originating from droplet microcolonies exposed to  
254 these low DETA-NONOate levels revealed heterogenous expression when compared to bacteria  
255 that were not exposed to DETA-NONOate (Fig. 6C: left). This argues that the broad distribution  
256 of *mcherry* fluorescence intensity is a consequence of spatially regulated *Phmp* firing (Fig. 6A).  
257 In contrast, *Yptb*  $\Delta hmp$  microcolonies challenged with DETA-NONOate for 4 hours revealed a  
258 tight distribution of *mcherry* fluorescence, indicating penetration of RNI through the entire  
259 microcolony (Fig. 6C: right). Therefore, the contour of fluorescence expression from a reporter  
260 construct was diagnostic of heterogeneous expression patterns.

261

### 262 **Activated BMDMs drive peripheral expression of *hmp* in droplet microcolonies.**

263 NO gas is produced by iNOS<sup>+</sup> cells around the periphery of a neutrophil encased *Yptb*  
264 microcolony (Fig. 7A). The iNOS<sup>+</sup> cells recruited to the inflammatory site consist of monocytes  
265 and macrophages (CD68<sup>+</sup>) cells and are physically separated from the bacterial microcolony  
266 (Fig. 7A: right) (Davis et al., 2015). When seeding is initiated, or microcolonies are small, there  
267 are very few iNOS<sup>+</sup> cells near the site of bacterial replication (Fig. 7A; Seeding Event,  
268 Neutrophil Recruitment). Once the colony is completely surrounded by neutrophils, iNOS<sup>+</sup> cells  
269 are apparent, forming a sphere about recruited neutrophils. Recruitment of iNOS<sup>+</sup> cells to a site  
270 of bacterial replication as a second step in bacterial restriction is consistent with work done in  
271 other pathogens (MacMicking et al., 1997; Murray & Nathan, 1999; Shiloh et al., 1999; Shiloh &  
272 Nathan, 2000; Vazquez-Torres et al., 2000). The 65  $\mu\text{m}$  droplets, with bone marrow-derived  
273 macrophages (BMDMs) associated with their surface, are predicted to allow extremely good

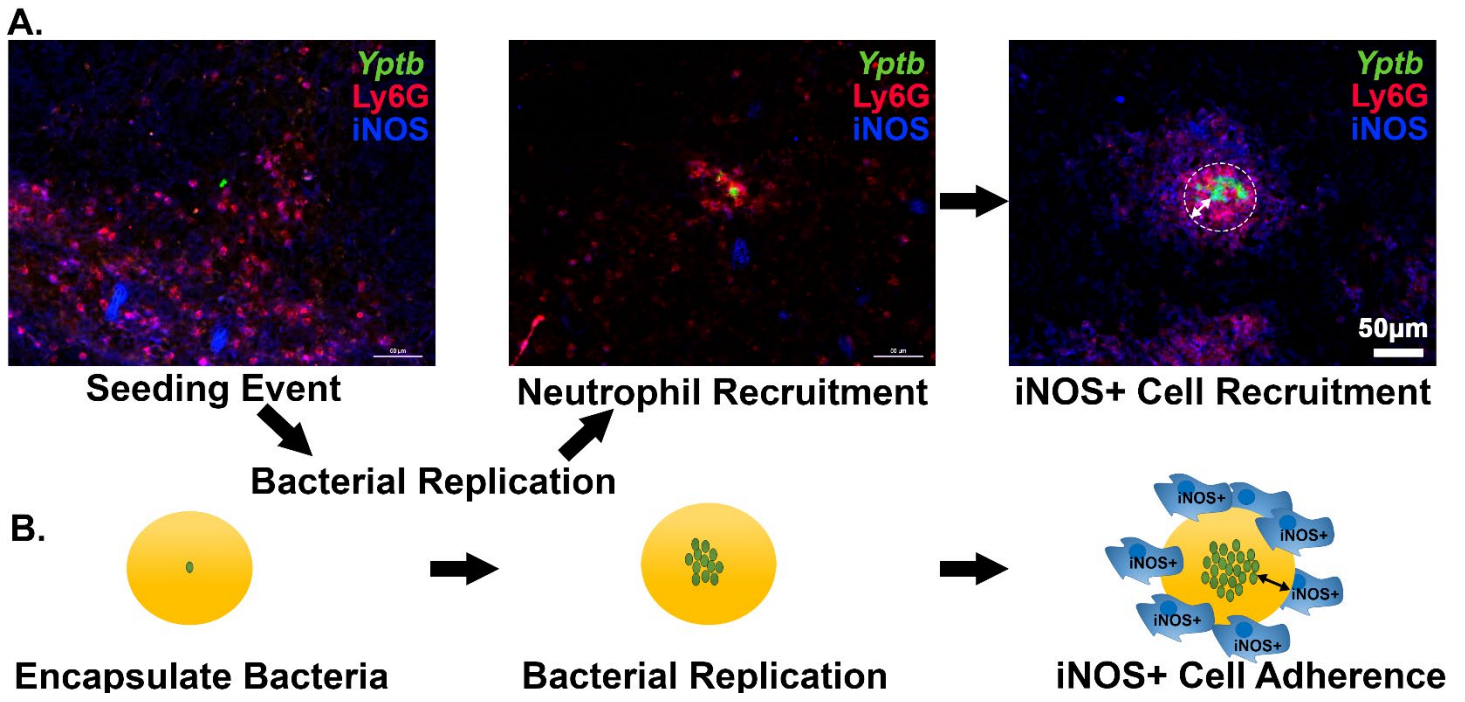

**Figure 7. Recruitment of iNOS<sup>+</sup> cells is associated with the maturation of *Yersinia pseudotuberculosis* microcolonies in tissue.** A. C57BL/6 mice were inoculated intravenously (i.v.) with 10<sup>3</sup> WT *gfp*<sup>+</sup> bacteria, and spleens were harvested 3 days post-inoculation (PI). Spleen tissue was probed with  $\alpha$ -Ly6G and  $\alpha$ -iNOS and visualized by fluorescence microscopy. Neutrophils ( $\alpha$ -Ly6G<sup>+</sup>; red) surround a cluster of *Y. pseudotuberculosis* (green). Surrounding the sphere of bacteria that is encased by neutrophils (white circle) is a layer of iNOS<sup>+</sup> cells. White arrows: The distance between *Y. pseudotuberculosis* and the iNOS<sup>+</sup> cell layer (not to scale). B. Model for droplet microcolonies. Bacteria are grown *in situ* within the droplets prior to challenge with iNOS<sup>+</sup> cells to mimic *Y. pseudotuberculosis* microcolony structure in tissue. Black arrows note there is space between iNOS<sup>+</sup> cells and cluster of bacteria.

274 mimicking of action-at-a-distance by iNOS<sup>+</sup> cells, as the microcolonies in the engineered system  
275 are situated at similar distances relative to the droplet surface (Fig. 7A, iNOS<sup>+</sup> Cell Recruitment).  
276 To recapitulate tissue dynamics, therefore, BMDMs were activated to produce iNOS<sup>+</sup> and added  
277 to droplets containing pregrown microcolonies (Fig. 7B). The agarose/ HyStem<sup>®</sup>-C Hydrogel  
278 droplet served as the buffer zone between the bacterial microcolony and the iNOS<sup>+</sup> cell layer  
279 (Fig. 7B). Pregrowth of the microcolony prior to exposure to BMDMs is envisioned to  
280 recapitulate the kinetics observed from histology of spleen tissues (Fig. 7A).

281 LPS and IFN $\gamma$  were incubated with BMDM to activate iNOS, prior to adding the cells  
282 for 4 hours to droplets harboring microcolonies previously grown for 7 hours (Fig. 8A and 8B)  
283 (Frawley et al., 2018; Green et al., 1994; Mosser & Gonçalves, 2015). Efficient expression of  
284 iNOS was dependent on LPS/IFN $\gamma$  treatment, based on immunofluorescence probing with anti-  
285 iNOS (Fig. 8B, left panel). Using this system, WT microcolonies encapsulated in droplets  
286 incubated with activated BMDMs exhibited spatially regulated expression of the *Phmp::mcherry*  
287 reporter that appeared to exactly mimic the behavior of bacteria growing in tissue (compare Fig.  
288 8C and 8D). As observed in tissues (Davis et al., 2015), this spatial regulation was lost in the  
289  $\Delta hmp$  strain in response to the addition of the activated BMDMs (Fig. 8E). Consistent with the  
290 activated BMDMs producing anti-microbial levels of iNOS, growth of the  $\Delta hmp$  strain was  
291 severely inhibited by the addition of BMDMs at a distance, dependent on the addition of  
292 LPS/IFN $\gamma$  and the presence of active iNOS (Fig. 8F;  $p < 0.0001$ ). Surprisingly, WT  
293 microcolonies were significantly larger in the presence of activated BMDMs, partially dependent  
294 on the presence of iNOS (Fig. 8F). This is consistent with activated macrophages providing  
295 soluble growth-promoting substances at a distance, including either NO<sub>3</sub><sup>-</sup> or oxidized cofactors  
296 as a consequence of Hmp activity.



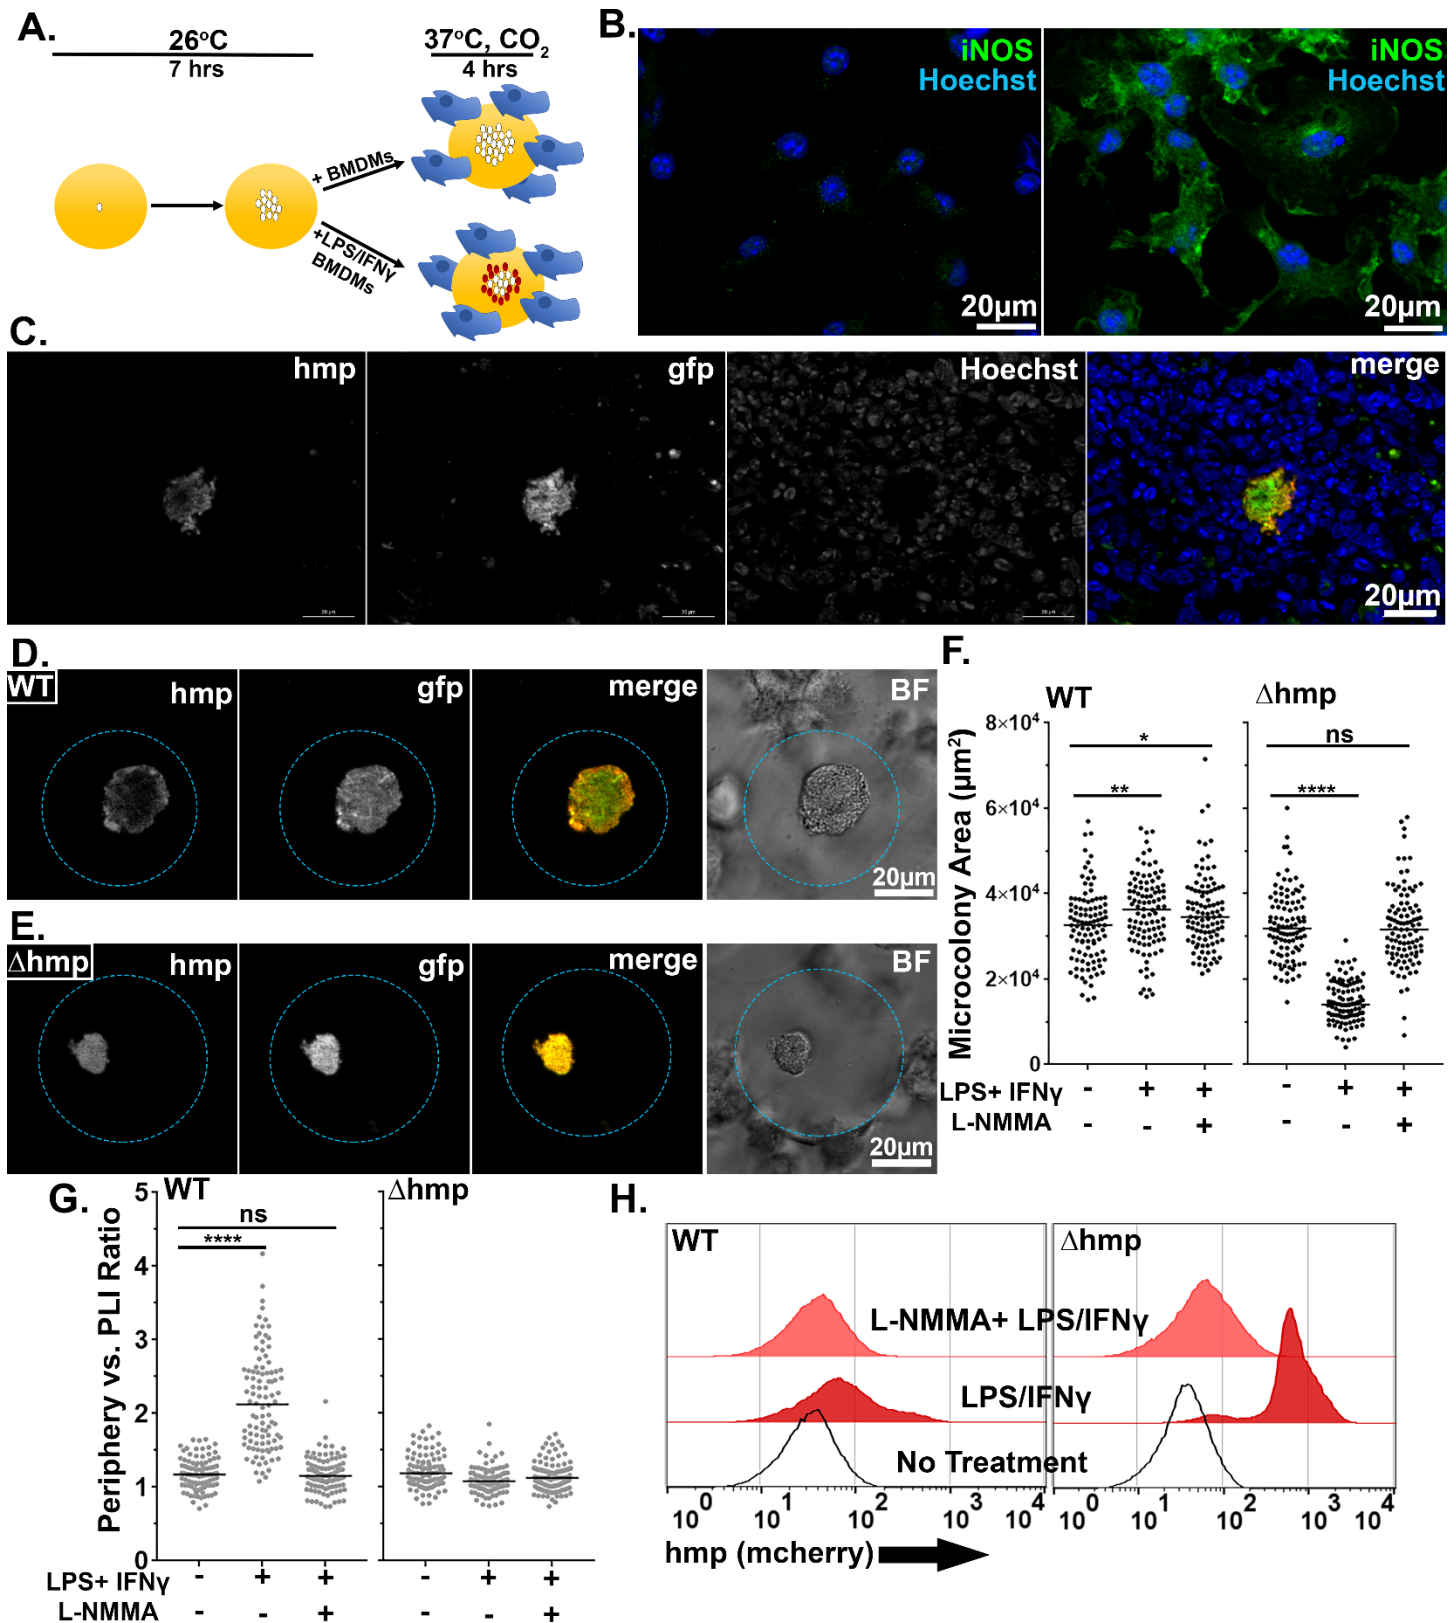

**Figure 8. Activated BMDMs drive peripheral expression of *hmp* in droplet microcolonies, mimicking tissue spatial regulation.** **A.** Experimental overview. Droplets containing *Y. pseudotuberculosis* were grown for 7 hours at 26°C prior to incubation with BMDMs for 4 hours at 37°C, CO<sub>2</sub>. The fixed microcolonies were visualized using brightfield and fluorescence microscopy and subjected to image analysis (Materials and



Methods). B. Resting BMDMs (left) and LPS/IFN $\gamma$ -primed BMDMs (right) were fixed, probed with  $\alpha$ -iNOS and visualized by fluorescence microscopy. (C). C57BL/6 mice were inoculated intravenously (i.v.) with  $10^3$  WT *gfp*<sup>+</sup> *P<sub>hmp</sub>-mcherry* bacteria, and spleens were harvested 3 days post-inoculation (PI) for fluorescence microscopy. A representative microcolony from tissue is shown. (D, E). Representative WT (D) and  $\Delta$ *hmp* (E) microcolonies incubated with LPS/IFN $\gamma$ -primed BMDMs. (F). Microcolony area in presence of BMDMs, incubated as noted. (G) Periphery versus PLI ratios for microcolonies incubated with BMDMs treated as noted. Black circles: 100 individual microcolonies from each condition. Line indicates median. (H). Flow cytometry of dispersed microcolonies after 4 hours of incubation with BMDMs. Dispersed bacteria were gated for GFP<sup>+</sup> and mCherry fluorescence was determined (Materials and Methods). Statistics: Mann-Whitney test, \*\*\*\*p<0.0001, \*\*\*p<0.0005, \*\*p<0.005, \*p<0.05, ns: not significant.

297 To show that peripheral expression of *hmp* was dependent upon RNI, the NOS inhibitor,  
298 L-NMMA, was introduced into this system (Fig. 8F, G). BMDMs were incubated in the presence  
299 or absence of 2mM L-NMMA prior to challenging droplet microcolonies, and expression of the  
300 *Phmp::mcherry* reporter was analyzed by microscopy (Frawley et al., 2018). In response to  
301 LPS/IFN $\gamma$ -primed BMDMs, there was a large increase in peripheral expression of the  
302 *Phmp::mcherry* reporter relative to the addition of BMDMs in the absence of activation (Fig.  
303 8G;  $p < 0.0001$ ). Peripheral expression of the mCherry reporter was lost in WT microcolonies  
304 when iNOS was inhibited by NMMA, with the resulting distribution being indistinguishable  
305 from BMDMs in the absence of activation (Fig. 8G). As expected, there was no spatial  
306 regulation of *Phmp::mcherry* in the strain lacking *hmp* activity, and the presence of NMMA had  
307 no effect (Fig. 8G). These results indicate that peripheral expression of *Phmp::mcherry* is  
308 dependent on the presence of intact Hmp protein and in response to RNI generated by iNOS  
309 activity.

310 To demonstrate that there was heterogeneous *hmp* expression in WT microcolonies on a  
311 population level, WT and  $\Delta hmp$  microcolonies challenged with unprimed, LPS/IFN $\gamma$ -primed, or  
312 L-NMMA treated-LPS/IFN $\gamma$ -primed BMDMs were dispersed and analyzed by FACS (Fig. 8H).  
313 In bacteria originating from WT microcolonies incubated with unprimed BMDMs, there were  
314 low levels of fluorescence from the *Phmp::mcherry* reporter (Fig. 8H: left, no treatment). After  
315 challenge with LPS/IFN $\gamma$ -primed BMDMs, there was increased *hmp* expression, with a small  
316 percentage of the population expressing high levels of the *Phmp::mcherry* reporter (Fig. 8H left,  
317 LPS/ IFN $\gamma$ ). Inhibition of activated BMDMs with NMMA resulted in a peak that was almost  
318 indistinguishable from the bacteria exposed to unprimed BMDMs (Fig. 8H left, L-NMMA +  
319 LPS/ IFN $\gamma$ ). Bacteria that originated from  $\Delta hmp$  microcolonies showed uniformly high

320 fluorescence contours for *Phmp::mcherry* after challenge with LPS/IFN $\gamma$ -primed BMDMs,  
321 showing that NO secreted by macrophages can penetrate the entire microcolony (Fig. 8H: right).  
322 As expected, there was low *Phmp::mcherry* fluorescence after challenge with unprimed BMDMs  
323 and NOS-inhibited BMDMs (Fig. 8H right; L-NMMA + LPS/ IFN $\gamma$ ). In summary, peripheral  
324 expression of *hmp* in WT droplet microcolonies was dependent upon challenge with LPS/IFN $\gamma$ -  
325 primed BMDMs and mimicked the bacterial response to recruited innate immune cells observed  
326 in mouse tissue.

327

## 328 **Discussion**

329 Many invasive bacterial pathogens can colonize hosts and disseminate to both peripheral  
330 and deep tissue sites where they establish replicative niches. For pathogens as diverse as  
331 *Mycobacterium tuberculosis* and *Staphylococcus aureus*, growth in tissues is followed by  
332 recruitment of neutrophils, macrophages and inflammatory monocytes, which can lead to the  
333 formation of abscesses or granulomas when the infection is not eradicated (Cheng et al., 2011;  
334 Pagan & Ramakrishnan, 2018). These pathogen-immune cell aggregates are intricate structures  
335 in which the pathogen interfaces with host cells, but also result in significant self and social  
336 interactions, making it difficult to reproduce in culture the entire set of events present in tissue.  
337 Although there is considerable research on infectious lesions caused by these pathogens, there  
338 are few informative culture models that reconstruct the pathogen-immune cell architecture  
339 occurring in tissues that preserve inter-microbial interactions (Elkington et al., 2019; Fitzgerald  
340 et al., 2014; Fonseca et al., 2017; Guggenberger et al., 2012; Guirado et al., 2015).

341 We have addressed this gap in the field by reconstructing *Yptb* inflammatory sites using  
342 microfluidic technology to generate a 3D model that allows interbacterial interactions to be

343 studied as well as action-at-a-distance by immune cells, with topology mimicking a tissue  
344 infection. *Yptb* is an intestinal pathogen that can establish extracellular foci in deep tissue sites  
345 after translocation across the intestine into either the bloodstream or regional lymph nodes  
346 (Barnes et al., 2006). In the course of establishing an infectious niche within the murine spleen,  
347 *Yptb* forms microcolonies tightly associated with recruitment of neutrophils that directly contact  
348 the cluster of bacteria, which are, in turn, encased by layers of more neutrophils followed by  
349 macrophages and monocytes that largely do not contact bacteria directly (Davis et al., 2015). The  
350 model system developed here closely mimics this topology. Droplets support the growth of *Yptb*  
351 microcolonies, and activated BMDMs localized at a similar distance to that observed in tissues  
352 drive a bacterial transcriptional response that recapitulates interactions observed in tissue.

353 Associated with the recruitment of immune cells to infection is the presence of iNOS<sup>+</sup> cells that  
354 are clearly activated to express iNOS and release NO. These cells do not directly contact the  
355 growing colony, so their ability to modulate microbial growth would appear to be linked to the  
356 production of soluble anti-microbial mediators. In concert with attack-from-a-distance, there is  
357 an outer shell of bacteria protecting the microcolony from RNI attack by producing the  
358 detoxifying Hmp protein that clearly responds to this stress without directly contacting iNOS<sup>+</sup>  
359 cells. To mimic clonal growth in the spleen and action at distance, our tissue culture system used  
360 microfluidics-generated droplets, which allowed us to maximize the capture of single bacteria  
361 within 65µm agarose/ HyStem<sup>®</sup>-C Hydrogel droplets and allow adhesion of macrophages on the  
362 droplet surface. The bacteria appeared to tolerate being encompassed in this environment as  
363 evident by *Yptb* replication, allowing a reasonable facsimile of spleen-resident microcolonies. In  
364 addition to the cells analyzed here, neutrophils are present surrounding the cluster of *Yptb*, but  
365 only a few peripheral bacteria are in direct contact with these cells, with the consequence that

366 they are largely inhibited by translocated TTSS effector proteins. Future work will involve  
367 modifying the system to allow the incorporation of neutrophils, so that the response of bacteria  
368 on the extreme periphery of the colony can be analyzed during this process. This will involve  
369 either embedding cells in the droplet matrix, or forcing controlled degradation of the matrix to  
370 allow close contact with the microcolony (Guggenberger et al., 2012; Sakai et al., 2012).

371 One of the surprising results from this study was that we could totally reproduce  
372 topologically driven regulation of the *hmp* promoter by incubating droplet-encased  
373 microcolonies in the presence of the NO generator DETA-NONOate. This indicates that  
374 production of RNI by iNOS<sup>+</sup> cells does not require directional targeting of the bacteria by these  
375 cells, but rather is a consequence of multi-cell collaboration to generate toxic amounts of RNI,  
376 with the concentrations determined by the total number of recruited iNOS<sup>+</sup> cells. By  
377 encompassing the infection site, the sum of the RNI produced by individual cells generates a  
378 sufficient amount of chemical to induce transcription of the reporter construct and kill bacterial  
379 mutants unable to produce Hmp.

380 To demonstrate that the addition of this chemical could reconstruct RNI signaling within  
381 the bacterial colony, we developed a script that could be used to quantify the accumulation of a  
382 fluorescence signal around the periphery of microcolonies. This strategy demonstrated that the  
383 use of DETA-NONOate was sufficient to generate a robust response on the periphery relative to  
384 a region internal to the colony that defined the area of lowest fluorescence intensity. It also  
385 demonstrated that the gradient of *Phmp* expression depends on both iNOS<sup>+</sup> activity and overall  
386 activation of macrophages by LPS and IFN $\gamma$ . Based on quantification of this ratio, we would  
387 argue that addition of BMDMs to the droplets generated somewhat lower amount of RNI than  
388 resulted from 1 mM DETA-NONOate (compare Figs. 6A to 8G). It would be difficult to directly

389 compare these results to mouse tissue, as the nature of the samples and preservation technique  
390 differs greatly from the droplet analysis. It does argue that the amount of RNI generated by 1  
391 mM DETA-NONOate is more than sufficient to explain the images generated from the mouse  
392 spleen.

393 One of the strengths of the synthetic droplet system is that we were able to disrupt the  
394 droplets to free the bacteria and analyze bacterial populations in bulk, a task that is often difficult  
395 to perform when isolating colonies from mammalian tissues. Once the colonies were disrupted,  
396 we demonstrated that individual cells can be subjected to flow cytometry analysis, allowing the  
397 response of spatially distinct population of bacteria to be analyzed. This approach should  
398 facilitate identifying additional macrophage secreted products that can penetrate microcolonies  
399 and control bacterial gene expression. There are a variety of small secretory molecule products  
400 of macrophages that have been identified, but the roles of these products in controlling bacterial  
401 growth or modulating gene expression of microorganisms is greatly understudied (Nathan, 1987;  
402 Sugimoto et al., 2011). Presumably, transcriptional analysis of bacterial subpopulations will  
403 facilitate dissection of previously unappreciated bacterial responses to the host and potentially  
404 identify new host strategies for restricting microbial growth.

405

## 406 **Materials and Methods**

407 ***Bacterial strains & growth conditions.*** All experiments used derivatives of the *Y.*  
408 *pseudotuberculosis* strain IP2666 (Balada-Llasat & Meccas, 2006). For all droplet experiments,  
409 bacteria were grown overnight into stationary phase in 2xYT broth (Crimmins et al., 2012; Davis  
410 et al., 2015) at 26 °C with rotation. Overnight cultures were diluted 1:2000 in 1% ultra-low-melt  
411 agarose (Sigma, USA, #A2576) in 2xYT containing 25% Hystem<sup>®</sup>-C hydrogel kit (ESI BIO,

412 CA, USA, #GS312) prior to droplet generation. For broth nitric oxide exposure, overnight  
413 cultures were diluted 1:100 in 2xYT and rotated at 26 °C for the indicated times.

414 **Generation of plasmid-based reporter strains.** The *Y. pseudotuberculosis* reporter strains  
415 in this study have been previously described (Crimmins et al., 2012; Davis et al., 2015). GFP<sup>+</sup>  
416 strains express GFP from the unrepressed *PTet* promoter of pACYC184 (Chang & Cohen, 1978).  
417 The *Phmp::mCherry* transcriptional fusion was constructed by fusing the *hmp* promoter to  
418 *mCherry* using overlap extension PCR, and cloning into the pMMB67EH plasmid (Jens P.  
419 Fiirstea, 1986). Strains that express both reporters are co-transformants of the compatible  
420 pACYC184 and pMMB67EH plasmids.

421 **Droplet generation.** CAD-designed microfluidics chips having 38 independent devices  
422 controlled by two input ports were constructed according to published protocols (Mazutis et al.,  
423 2013; Thibault et al., 2019) at the Boston College Nanofabrication Facility  
424 (<https://www.bc.edu/bc-web/schools/mcas/sites/cleanroom.html>). After construction, each  
425 microfluidics chip was stored at 37 °C in a box with the chip covered in tape. Prior to droplet  
426 generation, the device was primed with fluorinated oil (3M, USA, Novec 7500) and connected to  
427 two programmable syringe pumps (Harvard Apparatus 11 Elite Series) located in a temperature-  
428 controlled room at 37 °C. One pump was fitted with a 1ml syringe (BD, NJ, USA, #309628)  
429 having a 27-gauge needle (BD #305109), which was filled with 1.5% Pico-Surf 1 (Dolomite  
430 Microfluidics, MA, USA, 5% in Novec 7500) in Novec 7500 oil. In parallel, bacteria were  
431 diluted 1:2000 in 1% ultra-low-melt agarose containing Hystem-C<sup>®</sup> hydrogel, yielding  
432 approximately 5 x 10<sup>6</sup> cells/ml, and the mix was loaded into a 1 ml syringe that was fitted onto a  
433 second pump. Polyethylene (PE/2) tubing (SCI COM, AZ, USA, #BB31695-PE/2) was attached  
434 to each syringe and then inserted into the appropriate ports on the microfluidics device (Fig. 1).

435 The pump holding the oil-phase was set to 700  $\mu$ l/hour while the other pump was set to 400  
436  $\mu$ l/hour and droplets were collected in a 1.5 ml Eppendorf tube through tubing that had been  
437 inserted into the droplet collection port.

438 ***Oil Removal.*** 100  $\mu$ l of droplets was introduced into a 1.5 ml Eppendorf tube and 500  $\mu$ l  
439 of 10% 1H,1H,2H,2H-Perfluoro-1-octanol (PFO) (Sigma #370533-25G) in Novec 7500 was  
440 added to the droplets. After mixing vigorously, the tube was placed in a centrifuge for 30  
441 seconds at 250 RCF and 400  $\mu$ l of 25% Extralink (ESI BIO #GS3006) in PBS was added to  
442 crosslink the hydrogel within the agarose. After crosslinking, the droplets were flicked into  
443 suspension and centrifuged for 30 seconds at 250 RCF. The PBS/droplet layer was transferred to  
444 a new 1.5 ml Eppendorf tube, subjected to centrifugation for 30 seconds at 250 RCF, and washed  
445 with PBS. The remaining droplets were resuspended in 2xYT broth.

446 ***Droplet dispersal.*** Droplets were washed once in PBS at the indicated timepoints,  
447 incubated for 3 minutes at 50 °C, and a mixture of agarase (Sigma #A6306), collagenase and  
448 hyaluronidase (StemCell Technology, MA, USA, #07912) was added to the samples for 45  
449 minutes at 37 °C. Samples were then incubated for 3 minutes at 60 °C, subjected to centrifugation  
450 in a microfuge at 14K RPM for 1 minute. The supernatant was then aspirated, and the bacterial  
451 pellets were washed in PBS and prepared for flow analysis.

452 ***Nitric oxide experiments.*** To analyze the response of colonies to exogenous NO, droplets  
453 containing *Y. pseudotuberculosis* were generated, oil was removed, and the droplets were rotated  
454 for 7 hours at 26 °C in 2xYT broth to allow colony formation. After the 7-hour growth period,  
455 droplets were subjected to centrifugation for 30 seconds at 250 RCF and washed twice in PBS.  
456 50  $\mu$ l of droplets were transferred to a 1.5 ml Eppendorf tube and resuspended in 1 ml 2xYT



457 broth and exposed to DETA-NONOate (Sigma #AC32865) during growth at 26 °C with aeration  
458 for the indicated timepoints. For experiments performed at 37 °C with 5% CO<sub>2</sub> (Fig. 5), 50 µl of  
459 droplets were resuspended in 1 ml RPMI 1640 (Gibco, USA) supplemented with 10% FBS and 2  
460 mM glutamine media in 12- well non-tissue culture treated plates for the indicated times.

461 ***Isolation of bone marrow-derived macrophages.*** Bone marrow cells were isolated from  
462 femurs, tibias, and humeri of female 6-8-week-old C57BL/6 mice, and terminally differentiated  
463 into macrophages in medium containing mouse CSF generated as previously described  
464 (Auerbuch et al., 2009). Bone marrow-derived macrophages (BMDMs) were subsequently  
465 frozen in fetal bovine serum (FBS) with 10% dimethyl sulfoxide (DMSO) and plated one day  
466 prior to incubation with droplets in 90% fresh medium (RPMI 1640 (Gibco) supplemented with  
467 10% FBS and 2 mM glutamine) spiked with 10% sterile medium containing macrophage colony  
468 stimulating factor (MCSF) in 5% CO<sub>2</sub> at 37°C. Medium containing MCSF was conditioned by  
469 growth in the presence of mouse 3T3 fibroblasts that overproduce mouse MCSF at 37 °C with  
470 5% CO<sub>2</sub>, as previously described (Auerbuch et al., 2009; Leber et al., 2008). To stimulate  
471 BMDMs to induce iNOS expression, cells from frozen stocks were plated on non-tissue culture  
472 treated plates and allowed to recover overnight. The following day, BMDMs were stimulated  
473 with 200 U/ml IFN $\gamma$  (Peprotech, NJ, USA) and 100 ng/ml LPS (Sigma) for 12-15 hours (Mosser  
474 & Gonçalves, 2015). For inhibition of iNOS, BMDMs were incubated with 2 mM NG-  
475 Methyl-L-arginine monoacetate (L-NMMA) (Acros Organics, NJ, USA) one day prior to  
476 priming with LPS and IFN $\gamma$  (Frawley et al., 2018).

477 ***Droplet-BMDM experiments.*** Droplets containing *Y. pseudotuberculosis* were generated,  
478 oil was removed, and the droplet-encased bacteria were grown with aeration for 7 hours at 26 °C  
479 in 2xYT broth. After the 7-hour growth period, droplets were pelleted for 30 seconds at 250

480 RCF, washed twice in PBS and supernatant was removed. 50  $\mu$ l of droplets were transferred to a  
481 well in a 12-well coverslip-bottom plate (Cellvis, CA, USA, #P12-1.5H-N), approximately 2 x  
482  $10^6$  BMDMs in RPMI 1640 supplemented with 10% FBS and 2 mM glutamine were added to the  
483 well, and the incubation proceeded at 37 °C in the presence of 5% CO<sub>2</sub> for 4 hours. Samples  
484 were fixed in 2% paraformaldehyde (PFA) in PBS, washed in PBS, and fluorescent reporters  
485 were visualized by microscopic observation.

486 ***Murine model of systemic infection.*** Six to 8-week old female C57BL/6 mice obtained  
487 from Jackson Laboratories (Bar Harbor, ME) were injected intravenously with  $10^3$  bacteria.  
488 Three days post inoculation, spleens were removed and processed as described previously  
489 (Crimmins et al., 2012; Davis et al., 2015). All animal studies were approved by the Institutional  
490 Animal Care and Use Committee of Tufts University.

491 ***Flow cytometry.*** After microcolony dispersal, samples were fixed in 2% PFA in PBS,  
492 washed in PBS, and filtered through 40  $\mu$ m filters. Fluorescent reporters were detected using a  
493 Bio-Rad S3e cell sorter. 100,000 events were collected for each sample.

494 ***Fluorescence microscopy.*** After 4 hours of nitric oxide exposure or challenge with  
495 BMDMs, droplets were fixed in 2% PFA in PBS for 10 minutes. Droplets that were exposed to  
496 the nitric oxide donor were mounted in 8 well chamber slides using ProLong Gold (Life  
497 Technologies, CA, USA). Droplets that were incubated with BMDMs were visualized in 12-well  
498 coverslip-bottom plates (Cellvis). For visualization of BMDMs, cells were fixed in 2% PFA in  
499 PBS, permeabilized for 30 seconds in ice cold methanol and non-specific binding was blocked  
500 using 2% BSA in PBS. Cells were stained with rabbit anti-mouse iNOS (Abcam, MA, USA) at a  
501 dilution of 1:100 and goat anti-rabbit-Alexa 488 (Invitrogen, CA, USA) at a dilution of 1:500.

502 Nuclei were stained with Hoechst at a dilution of 1:10,000. To analyze tissue samples, C57BL/6  
503 mice were inoculated intravenously with the WT *gfp+ Phmp::mcherry* strain. Three days post  
504 inoculation, spleens were harvested and fixed in 4% PFA in PBS for 3 hours, tissue was frozen  
505 embedded in Sub Xero freezing media (Mercedes Medical, FL, USA) and cut into 10  $\mu\text{m}$   
506 sections using a cryostat microtome (Microm HM505E). To visualize reporters, sections were  
507 thawed in PBS, stained with Hoechst at a 1:10,000 dilution, washed in PBS, and coverslips were  
508 mounted using ProLong Gold (Life Technologies). Tissue was imaged with a 63x objective on a  
509 Zeiss Axio Observer.Z1 (Zeiss) microscope with Colibri.2 LED light source, an Apotome.2  
510 (Zeiss) for optical sectioning, and an ORCA-R<sup>2</sup> digital CCD camera (Hamamatsu) (Crimmins et  
511 al., 2012; Davis et al., 2015).

512 ***Determination of droplet size, bacterial counts and microcolony area.*** For determination  
513 of droplet size, images were captured by phase contrast microscopy using a 20x lens, and images  
514 were analyzed to identify 300 droplets, with analysis in Volocity<sup>TM</sup>. Droplet size was determined  
515 by identifying a threshold that defines edges of droplets and determining the diameter in pixels.  
516 The data were then converted to metric scale using a stage micrometer and displayed as a  
517 histogram. To determine bacterial counts, images were captured by phase contrast and  
518 fluorescence microscopy using a 20x lens and the number of bacteria/droplet was manually  
519 counted in 500 droplets. To determine microcolony area, images were captured by phase contrast  
520 and fluorescence microscopy using a 20x lens with analysis in Volocity<sup>TM</sup>. Microcolony area  
521 was determined by identifying a threshold that defines edges of microcolonies in the GFP  
522 channel and determining the number of pixels in the region of interest (ROI). The data were then  
523 converted to metric scale using a stage micrometer and displayed as  $\mu\text{m}^2$ .

524            ***Quantitative mage analysis.*** MATLAB scripts were written to calculate the average  
525 intensity of fluorescence about the periphery of microcolonies and point of lowest fluorescence  
526 (<https://github.com/isberg-lab/droplet>). Periphery to point of lowest intensity (PLI) ratios were  
527 calculated by generating a mask representing the periphery of a defined width of the  
528 microcolony, and a mask representing the PLI of a defined radius. The periphery mask was  
529 generated by first thresholding the green channel using Otsu's method and converting the  
530 resulting matrix into a binary matrix. The binary matrix was morphologically opened with a  
531 disk-shaped structuring element of radius two and then morphologically closed with a disk-  
532 shaped structuring element of radius four. Morphologic opening and closing eliminate dim  
533 artifacts and fuse the microcolony mask into a single region of interest (ROI). Any remaining  
534 holes within contiguous ROIs are filled. ROIs touching the edge of the field are removed, as are  
535 all but the largest ROI in the field. This ROI, covering the entire microcolony, is eroded with a  
536 disk-shaped structuring element of radius 12 and complemented. The initial mask and  
537 complemented eroded mask are combined to achieve a binary mask of the periphery of the  
538 object. The number of pixels and the total intensity in the resulting mask was recorded. The mask  
539 was applied to the raw image data in the red channel, and the total intensity was recorded. Total  
540 intensity of the red was normalized to the number of pixels to achieve an average intensity for  
541 the entire periphery. The average intensity of the red channel was normalized to the average  
542 intensity of the green channel. To calculate the PLI, the determined eroded mask was applied to  
543 the red channel to isolate the pixels belonging to the microcolony while excluding those that are  
544 part of the periphery. A Gaussian blur of  $sd = 2.0$  was applied to reduce the effects of low-  
545 intensity noise introduced by the imaging process. The coordinates of the minimum value of this  
546 image were calculated, generating a binary matrix with value = 1 at the coordinates of the PLI

547 and zero at all other points. This matrix was morphologically dilated with a structuring element  
548 of radius 5 to sample a region of lowest intensity rather than a single pixel. The number of pixels  
549 in this resulting mask are then recorded and the total intensity of the green channel was recorded.  
550 The mask was applied to the raw image data in the red channel, and the total intensity recorded.  
551 Total intensity was normalized to number of pixels to achieve an average intensity for the entire  
552 PLI region in the red and this value was normalized to the average intensity of the green channel.

553

554 **Acknowledgements.** The work in this study was supported by NIAID grants R01  
555 AI110684 and R21 151593 to RRI and U01AI124302 and R01 AI110724 to TvO. SC and LS  
556 were supported by predoctoral training grant T32 TM007310 from NIGMS. We thank the  
557 Boston College Integrated Sciences Nanofabrication Facility for support and thank Kristen  
558 Davis, Efrat Hamami and Wenwen Huo for review of the manuscript.

559

560 **Figure Legends**

561 **Figure 1. Droplet gels support clonal growth of *Yersinia pseudotuberculosis*.** A. *Y.*  
562 *pseudotuberculosis* was added to molten agarose/HyStem<sup>®</sup>-C Hydrogel and introduced into a  
563 microfluidics device, allowing encapsulation within oil-coated droplets (Materials and Methods).  
564 Oil was removed from the droplets and bacteria were cultured *in situ* within the droplets  
565 (Thibault et al., 2019). B. Design of the microfluidics device. Noted are oil and aqueous (molten  
566 gel/bacteria mixture) phase inlets (red and blue arrows, respectively). Droplets were collected  
567 into a tube at the droplet output (black arrow) (Thibault et al., 2019). C. Distribution of droplet  
568 sizes prior to oil removal. Droplet size was determined by capturing images from phase contrast  
569 microscopy followed by image processing (Materials and Methods). D, E. Droplets largely  
570 contain one or two bacterial cells immediately after encapsulation. D. Image of droplets  
571 containing *Y. pseudotuberculosis gfp*<sup>+</sup>. E. Presence of bacteria was scored immediately after  
572 encapsulation by phase contrast and fluorescence microscopy, scoring for GFP. F. *Y.*  
573 *pseudotuberculosis* grows within colonies in droplets. Droplets containing encapsulated *Y.*  
574 *pseudotuberculosis* were cultured at 26°C, and microcolonies were visualized at indicated  
575 timepoints by phase contrast and fluorescence microscopy. Microcolony areas were determined  
576 by image analysis (Materials and Methods). Each timepoint is median +/- 95% confidence  
577 interval (CI) of 3 biological replicates of 50 microcolonies. G. Representative images of  
578 microcolonies from (F) at the noted times visualized by phase contrast and fluorescence  
579 microscopy. Scale bar: 50µm.

580

581 **Figure 2. Droplet-generated *Yersinia pseudotuberculosis* microcolonies require Hmp to**  
582 **maintain growth in presence of NO.** Indicated *Y. pseudotuberculosis* strains were cultured in

583 2xYT with rotation at 26 °C for 7 hours prior to DETA-NONOate exposure. At the indicated  
584 timepoints, an aliquot of droplets was fixed and visualized by fluorescence microscopy. (A, D).  
585 Microcolony area determined from captured images followed by image analysis (Materials and  
586 Methods). Each point represents a single droplet with median noted. (B, E). Representative WT  
587 (B) and  $\Delta hmp$  (E) microcolonies after 8 hours of treatment with and without DETA-NONOate.  
588 Scale bar: 50 $\mu$ m. (C, F). Overnight broth cultures of *Y. pseudotuberculosis* were diluted 1:10 in  
589 2xYT broth prior to addition of DETA-NONOate. At indicated timepoints, culture density was  
590 determined (Materials and Methods).

591

592 **Figure 3. Topological constraints drive non-uniform expression of *hmp*.** (A). Model of the  
593 predicted outcome for the nitric oxide (NO) response of *Y. pseudotuberculosis* grown in broth  
594 versus droplet culture (Davis et al., 2015). Red: bacteria showing high expression of *P<sub>hmp</sub>-*  
595 *mCherry* reporter. White: bacteria showing undetectable mCherry fluorescence. (B, C). *Y.*  
596 *pseudotuberculosis* grown in droplet microcolonies show altered response to NO. Noted  
597 bacterial strains harboring *gfp*<sup>+</sup> *P<sub>hmp</sub>-mcherry* plasmids were grown in either broth (open  
598 histograms) or droplets (filled histograms) in the presence of NO donor for the noted times.  
599 Droplet microcolonies were dispersed at noted times and analyzed by flow cytometry (Materials  
600 and Methods). B. Flow analysis of mCherry channel. C. Analysis of GFP channel.

601

602 **Figure 4. Spatial regulation of *hmp* expression in tissues can be reproduced in droplet**  
603 **culture.** (A). Experimental overview. Droplets seeded with *Y. pseudotuberculosis* harboring  
604 fluorescence reporters were incubated for 7 hours at 26 °C and varying concentrations of DETA-

605 NONOate were added to the cultures for 4 hours at 37 °C, 5% CO<sub>2</sub>. After 4 hours, the droplets  
606 were fixed and visualized using brightfield and fluorescence microscopy. (B, C). Representative  
607 WT and  $\Delta hmp$  microcolonies after 4 hours of treatment with 1mM DETA-NONOate.

608

609 **Figure 5. Strategy for quantification of *hmp* expression localized on periphery of**  
610 **microcolonies.** A. Design of script that allows the identification of regions of interest (ROIs) for  
611 the purpose of determining the average fluorescence intensities and normalization strategies  
612 within the ROIs. Script defines periphery of microcolony and sets mask, allowing a user-defined  
613 width extending into the microcolony along with a point of lowest intensity (PLI) which is  
614 determined based on the mCherry signal for each microcolony. The fluorescence at the periphery  
615 is calculated as a ratio of the average pixel intensity of the mcherry channel in periphery divided  
616 by the average pixel intensity of the GFP channel in the periphery, allowing normalization for  
617 bacterial expression. The fluorescence for the defined PLI is also calculated in the same fashion,  
618 and the periphery verses PLI ratio is determined (Supplemental Data). B. Example of  
619 identification of periphery, mask generation and definition of peripheral ROI. The GFP channel  
620 defines the periphery, allowing mask to be set. Within the mask, the periphery is defined as  
621 extending 12 pixels into the microcolony. The PLI within the mask is defined as the area of 5-  
622 pixel radius with the lowest intensity in the mCherry channel.

623

624 **Figure 6. Hmp activity is required for peripheral expression of *hmp* in response to NO.** (A-  
625 C). The presence of Hmp activity is required for *Y. pseudotuberculosis* to have enhanced  
626 expression of  $P_{hmp}$  in microcolonies exposed to NO. A. Periphery versus PLI ratio for



627 microcolonies as a function of DETA-NONOate concentration in microcolonies from noted  
628 bacterial strains. B. Microcolony area (pixels<sup>2</sup>) for WT and  $\Delta hmp$  microcolonies at different  
629 concentrations of DETA-NONOate. Black circles: 100 individual microcolonies measured for  
630 each condition. Lines indicate the medians. (C). Flow cytometric analysis of dispersed  
631 microcolonies. Droplets were dispersed into single cells after 4 hours of DETA-NONOate  
632 treatment at noted concentrations and subjected to flow cytometry (Materials and Methods).  
633 Bacteria were gated for GFP<sup>+</sup> and analyzed for mCherry signal. Statistics: Mann-Whitney test,  
634 \*\*\*\*p<0.0001, ns: not significant.

635

636 **Figure 7. Recruitment of iNOS<sup>+</sup> cells is associated with the maturation of *Yersinia***  
637 ***pseudotuberculosis* microcolonies in tissue.** A. C57BL/6 mice were inoculated intravenously  
638 (i.v.) with 10<sup>3</sup> WT *gfp*<sup>+</sup> bacteria, and spleens were harvested 3 days post-inoculation (PI). Spleen  
639 tissue was probed with  $\alpha$ -Ly6G and  $\alpha$ -iNOS and visualized by fluorescence microscopy.  
640 Neutrophils ( $\alpha$ -Ly6G<sup>+</sup>; red) surround a cluster of *Y. pseudotuberculosis* (green). Surrounding the  
641 sphere of bacteria that is encased by neutrophils (white circle) is a layer of iNOS<sup>+</sup> cells. White  
642 arrows: The distance between *Y. pseudotuberculosis* and the iNOS<sup>+</sup> cell layer (not to scale). B.  
643 Model for droplet microcolonies. Bacteria are grown *in situ* within the droplets prior to challenge  
644 with iNOS<sup>+</sup> cells to mimic *Y. pseudotuberculosis* microcolony structure in tissue. Black arrows  
645 note there is space between iNOS<sup>+</sup> cells and cluster of bacteria.

646

647 **Figure 8. Activated BMDMs drive peripheral expression of *hmp* in droplet microcolonies,**  
648 **mimicking tissue spatial regulation.** A. Experimental overview. Droplets containing *Y.*

649 *pseudotuberculosis* were grown for 7 hours at 26 °C prior to incubation with BMDMs for 4 hours  
650 at 37 °C, CO<sub>2</sub>. The fixed microcolonies were visualized using brightfield and fluorescence  
651 microscopy and subjected to image analysis (Materials and Methods). B. Resting BMDMs (left)  
652 and LPS/IFN $\gamma$ -primed BMDMs (right) were fixed, probed with  $\alpha$ -iNOS and visualized by  
653 fluorescence microscopy. (C). C57BL/6 mice were inoculated intravenously (i.v.) with 10<sup>3</sup> WT  
654 *gfp*<sup>+</sup> *P<sub>hmp</sub>-mcherry* bacteria, and spleens were harvested 3 days post-inoculation (PI) for  
655 fluorescence microscopy. A representative microcolony from tissue is shown. (D, E).  
656 Representative WT (D) and  $\Delta$ *hmp* (E) microcolonies incubated with LPS/IFN $\gamma$ -primed BMDMs.  
657 (F). Microcolony area in presence of BMDMs, incubated as noted. (G) Periphery versus PLI  
658 ratios for microcolonies incubated with BMDMs treated as noted. Black circles: 100 individual  
659 microcolonies from each condition. Line indicates median. (H). Flow cytometry of dispersed  
660 microcolonies after 4 hours of incubation with BMDMs. Dispersed bacteria were gated for GFP<sup>+</sup>  
661 and mCherry fluorescence was determined (Materials and Methods). Statistics: Mann-Whitney  
662 test, \*\*\*\*p<0.0001, \*\*\*p<0.0005, \*\*p<0.005, \*p<0.05, ns: not significant.

663  
664 **Figure S1. Topological constraints drive non-uniform expression of *hmp*.** (A-D). *Y.*  
665 *pseudotuberculosis* grown in droplet microcolonies show altered response to NO. Noted  
666 bacterial strains harboring *gfp*<sup>+</sup> *P<sub>hmp</sub>-mcherry* plasmids were grown in either broth (open  
667 histograms) or droplets (filled histograms) in the presence of NO donor for the noted times.  
668 Droplet microcolonies were dispersed at noted times and analyzed by flow cytometry (Materials  
669 and Methods). A. Flow analysis of mCherry channel from WT. B. Analysis of GFP channel from  
670 WT. C. Flow analysis of mCherry channel from  $\Delta$ *hmp*. C. Analysis of GFP channel from  $\Delta$ *hmp*.  
671

672

## 673 **References**

- 674 Auerbuch, V., Golenbock, D. T., & Isberg, R. R. (2009). Innate immune recognition of *Yersinia*  
675 *pseudotuberculosis* type III secretion. *PLoS Pathog*, *5*(12), e1000686.  
676 doi:10.1371/journal.ppat.1000686
- 677 Balada-Llasat, J. M., & Mecsas, J. (2006). *Yersinia* has a tropism for B and T cell zones of  
678 lymph nodes that is independent of the type III secretion system. *PLoS Pathog*, *2*(9), e86.  
679 doi:10.1371/journal.ppat.0020086
- 680 Barnes, P. D., Bergman, M. A., Mecsas, J., & Isberg, R. R. (2006). *Yersinia pseudotuberculosis*  
681 disseminates directly from a replicating bacterial pool in the intestine. *J Exp Med*, *203*(6),  
682 1591-1601. doi:10.1084/jem.20060905
- 683 Bogdan, C. (2001). Nitric oxide and the immune response. *Nat Immunol*, *2*(10), 907-916.  
684 doi:10.1038/ni1001-907
- 685 Carter, P. B., & Collins, F. M. (1974). The route of enteric infection in normal mice. *J Exp Med*,  
686 *139*(5), 1189-1203. doi:10.1084/jem.139.5.1189
- 687 Cha, B. H., Shin, S. R., Leijten, J., Li, Y. C., Singh, S., Liu, J. C., . . . Khademhosseini, A.  
688 (2017). Integrin-Mediated Interactions Control Macrophage Polarization in 3D  
689 Hydrogels. *Adv Healthc Mater*, *6*(21). doi:10.1002/adhm.201700289
- 690 Chang, A. C., & Cohen, S. N. (1978). Construction and characterization of amplifiable  
691 multicopy DNA cloning vehicles derived from the P15A cryptic miniplasmid. *Journal of*  
692 *Bacteriology*, *134*(3), 1141-1156. Retrieved from  
693 <https://jb.asm.org/content/jb/134/3/1141.full.pdf>
- 694 Cheng, A. G., DeDent, A. C., Schneewind, O., & Missiakas, D. (2011). A play in four acts:  
695 *Staphylococcus aureus* abscess formation. *Trends Microbiol*, *19*(5), 225-232.  
696 doi:10.1016/j.tim.2011.01.007
- 697 Cheng, A. G., Kim, H. K., Burts, M. L., Krausz, T., Schneewind, O., & Missiakas, D. M. (2009).  
698 Genetic requirements for *Staphylococcus aureus* abscess formation and persistence in  
699 host tissues. *FASEB J*, *23*(10), 3393-3404. doi:10.1096/fj.09-135467
- 700 Crimmins, G. T., Mohammadi, S., Green, E. R., Bergman, M. A., Isberg, R. R., & Mecsas, J.  
701 (2012). Identification of MrtAB, an ABC transporter specifically required for *Yersinia*  
702 *pseudotuberculosis* to colonize the mesenteric lymph nodes. *PLoS Pathog*, *8*(8),  
703 e1002828. doi:10.1371/journal.ppat.1002828
- 704 Davis, K. M., Mohammadi, S., & Isberg, R. R. (2015). Community behavior and spatial  
705 regulation within a bacterial microcolony in deep tissue sites serves to protect against  
706 host attack. *Cell Host Microbe*, *17*(1), 21-31. doi:10.1016/j.chom.2014.11.008
- 707 Elkington, P., Lerm, M., Kapoor, N., Mahon, R., Pienaar, E., Huh, D., . . . Schlesinger, L. S.  
708 (2019). In Vitro Granuloma Models of Tuberculosis: Potential and Challenges. *J Infect*  
709 *Dis*, *219*(12), 1858-1866. doi:10.1093/infdis/jiz020
- 710 Fitzgerald, L. E., Abendano, N., Juste, R. A., & Alonso-Hearn, M. (2014). Three-dimensional in  
711 vitro models of granuloma to study bacteria-host interactions, drug-susceptibility, and  
712 resuscitation of dormant mycobacteria. *Biomed Res Int*, *2014*, 623856.  
713 doi:10.1155/2014/623856

- 714 Fonseca, K. L., Rodrigues, P. N. S., Olsson, I. A. S., & Saraiva, M. (2017). Experimental study  
715 of tuberculosis: From animal models to complex cell systems and organoids. *PLoS*  
716 *Pathog*, *13*(8), e1006421. doi:10.1371/journal.ppat.1006421
- 717 Frawley, E. R., Karlinsey, J. E., Singhal, A., Libby, S. J., Doulias, P.-T., Ischiropoulos, H., &  
718 Fang, F. C. (2018). Nitric Oxide Disrupts Zinc Homeostasis in Salmonella enterica Serovar  
719 Typhimurium. *mBio*, *9*(4), e01040-01018. doi:10.1128/mBio.01040-18
- 720 Freund, S., Czech, B., Trulzsch, K., Ackermann, N., & Heesemann, J. (2008). Unusual, virulence  
721 plasmid-dependent growth behavior of *Yersinia enterocolitica* in three-dimensional  
722 collagen gels. *J Bacteriol*, *190*(12), 4111-4120. doi:10.1128/JB.00156-08
- 723  
724 Giancotti, F. G., & Ruoslahti, E. (1999). Integrin Signaling. *Science*, *285*, 1028-1033.
- 725 Green, S. J., Aniagolu, J., & Raney, J. J. (1994). Oxidative Metabolism of Murine Macrophages.  
726 *Current Protocols in Immunology*, *12*(1), 14.15.11-14.15.11.  
727 doi:10.1002/0471142735.im1405s12
- 728 Guggenberger, C., Wolz, C., Morrissey, J. A., & Heesemann, J. (2012). Two distinct coagulase-  
729 dependent barriers protect *Staphylococcus aureus* from neutrophils in a three dimensional  
730 in vitro infection model. *PLoS Pathog*, *8*(1), e1002434.  
731 doi:10.1371/journal.ppat.1002434
- 732 Guirado, E., Mbawuiké, U., Keiser, T. L., Arcos, J., Azad, A. K., Wang, S. H., & Schlesinger, L.  
733 S. (2015). Characterization of host and microbial determinants in individuals with latent  
734 tuberculosis infection using a human granuloma model. *mBio*, *6*(1), e02537-02514.  
735 doi:10.1128/mBio.02537-14
- 736 Jens P. Fjirstea, W. P., Ronald Frank, Helmut Blbcker, Peter Scholz, Michael Bagdasarian, and  
737 Erich Lanka. (1986). Molecular cloning of the plasmid RP4 primase region in a multi-  
738 host-range tacP expression vector. *Gene*, *48*, 119-131.
- 739 Koster, S., Angile, F. E., Duan, H., Agresti, J. J., Wintner, A., Schmitz, C., . . . Weitz, D. A.  
740 (2008). Drop-based microfluidic devices for encapsulation of single cells. *Lab Chip*, *8*(7),  
741 1110-1115. doi:10.1039/b802941e
- 742 Leber, J. H., Crimmins, G. T., Raghavan, S., Meyer-Morse, N. P., Cox, J. S., & Portnoy, D. A.  
743 (2008). Distinct TLR- and NLR-mediated transcriptional responses to an intracellular  
744 pathogen. *PLoS Pathog*, *4*(1), e6. doi:10.1371/journal.ppat.0040006
- 745 MacMicking, J. D., North, R. J., LaCourse, R., Mudgett, J. S., Shah, S. K., & Nathan, C. F.  
746 (1997). Identification of nitric oxide synthase as a protective locus against tuberculosis.  
747 *Proc Natl Acad Sci U S A*, *94*(10), 5243-5248. doi:10.1073/pnas.94.10.5243
- 748 Macosko, E. Z., Basu, A., Satija, R., Nemes, J., Shekhar, K., Goldman, M., . . . McCarroll, S.  
749 A. (2015). Highly Parallel Genome-wide Expression Profiling of Individual Cells Using  
750 Nanoliter Droplets. *Cell*, *161*(5), 1202-1214. doi:10.1016/j.cell.2015.05.002
- 751 Mazutis, L., Gilbert, J., Ung, W. L., Weitz, D. A., Griffiths, A. D., & Heyman, J. A. (2013).  
752 Single-cell analysis and sorting using droplet-based microfluidics. *Nat Protoc*, *8*(5), 870-  
753 891. doi:10.1038/nprot.2013.046
- 754 Mosser, D. M., & Gonçalves, R. (2015). Activation of Murine Macrophages. In *Current*  
755 *Protocols in Immunology* (pp. 14.12.11-14.12.10).
- 756 Murray, H. W., & Nathan, C. F. (1999). Macrophage microbicidal mechanisms in vivo: reactive  
757 nitrogen versus oxygen intermediates in the killing of intracellular visceral *Leishmania*  
758 *donovani*. *J Exp Med*, *189*(4), 741-746. doi:10.1084/jem.189.4.741

- 759 Nathan, C. F. (1987). Secretory products of macrophages. *J Clin Invest*, 79(2), 319-326.  
760 doi:10.1172/JCI112815
- 761 Pagan, A. J., & Ramakrishnan, L. (2018). The Formation and Function of Granulomas. *Annu Rev*  
762 *Immunol*, 36, 639-665. doi:10.1146/annurev-immunol-032712-100022
- 763 Poole, R. K., Anjum, M. F., Membrillo-Hernández, J., Kim, S. O., Hughes, M. N., & Stewart, V.  
764 (1996). Nitric oxide, nitrite, and Fnr regulation of hmp (flavo-hemoglobin) gene  
765 expression in *Escherichia coli* K-12. *Journal of Bacteriology*, 178(18), 5487-5492.  
766 doi:10.1128/jb.178.18.5487-5492.1996
- 767 Poole, R. K., & Hughes, M. N. (2000). New functions for the ancient globin family: bacterial  
768 responses to nitric oxide and nitrosative stress. *Mol Microbiol*, 36(4), 775-783.  
769 doi:10.1046/j.1365-2958.2000.01889.x
- 770 Robinson, J. L., & Brynildsen, M. P. (2013). A kinetic platform to determine the fate of nitric  
771 oxide in *Escherichia coli*. *PLoS Comput Biol*, 9(5), e1003049.  
772 doi:10.1371/journal.pcbi.1003049
- 773 Sakai, S., Inagaki, H., Inamoto, K., & Taya, M. (2012). Wrapping tissues with a pre-established  
774 cage-like layer composed of living cells. *Biomaterials*, 33(28), 6721-6727.  
775 doi:10.1016/j.biomaterials.2012.06.027
- 776 Shiloh, M. U., MacMicking, J. D., Nicholson, S., Brause, J. E., Potter, S., Marino, M., . . .  
777 Nathan, C. (1999). Phenotype of mice and macrophages deficient in both phagocyte  
778 oxidase and inducible nitric oxide synthase. *Immunity*, 10(1), 29-38. doi:10.1016/s1074-  
779 7613(00)80004-7
- 780 Shiloh, M. U., & Nathan, C. F. (2000). Reactive nitrogen intermediates and the pathogenesis of  
781 *Salmonella* and mycobacteria. *Curr Opin Microbiol*, 3(1), 35-42. doi:10.1016/s1369-  
782 5274(99)00048-x
- 783 Simonet, M., Richard, S., & Berche, P. (1990). Electron microscopic evidence for in vivo  
784 extracellular localization of *Yersinia pseudotuberculosis* harboring the pYV plasmid.  
785 *Infect Immun*, 58(3), 841-845. Retrieved from  
786 <https://www.ncbi.nlm.nih.gov/pubmed/2307522>
- 787 Songsungthong, W., Higgins, M. C., Rolan, H. G., Murphy, J. L., & Mecsas, J. (2010). ROS-  
788 inhibitory activity of YopE is required for full virulence of *Yersinia* in mice. *Cell*  
789 *Microbiol*, 12(7), 988-1001. doi:10.1111/j.1462-5822.2010.01448.x
- 790 Sugimoto, M., Sakagami, H., Yokote, Y., Onuma, H., Kaneko, M., Mori, M., . . . Tomita, M.  
791 (2011). Non-targeted metabolite profiling in activated macrophage secretion.  
792 *Metabolomics*, 8(4), 624-633. doi:10.1007/s11306-011-0353-9
- 793 Thibault, D., Jensen, P. A., Wood, S., Qabar, C., Clark, S., Shainheit, M. G., . . . van Opijnen, T.  
794 (2019). Droplet Tn-Seq combines microfluidics with Tn-Seq for identifying complex  
795 single-cell phenotypes. *Nat Commun*, 10(1), 5729. doi:10.1038/s41467-019-13719-9
- 796 Vazquez-Torres, A., Jones-Carson, J., Mastroeni, P., Ischiropoulos, H., & Fang, F. C. (2000).  
797 Antimicrobial actions of the NADPH phagocyte oxidase and inducible nitric oxide  
798 synthase in experimental salmonellosis. I. Effects on microbial killing by activated  
799 peritoneal macrophages in vitro. *J Exp Med*, 192(2), 227-236. doi:10.1084/jem.192.2.227

800
